# Supplementary material
Source: PubMed Central journal article supplement (PMC4174939)
Supplement: supp_114.166827_166827SI.pdf [file supp_114.166827_166827SI.pdf]

**A**

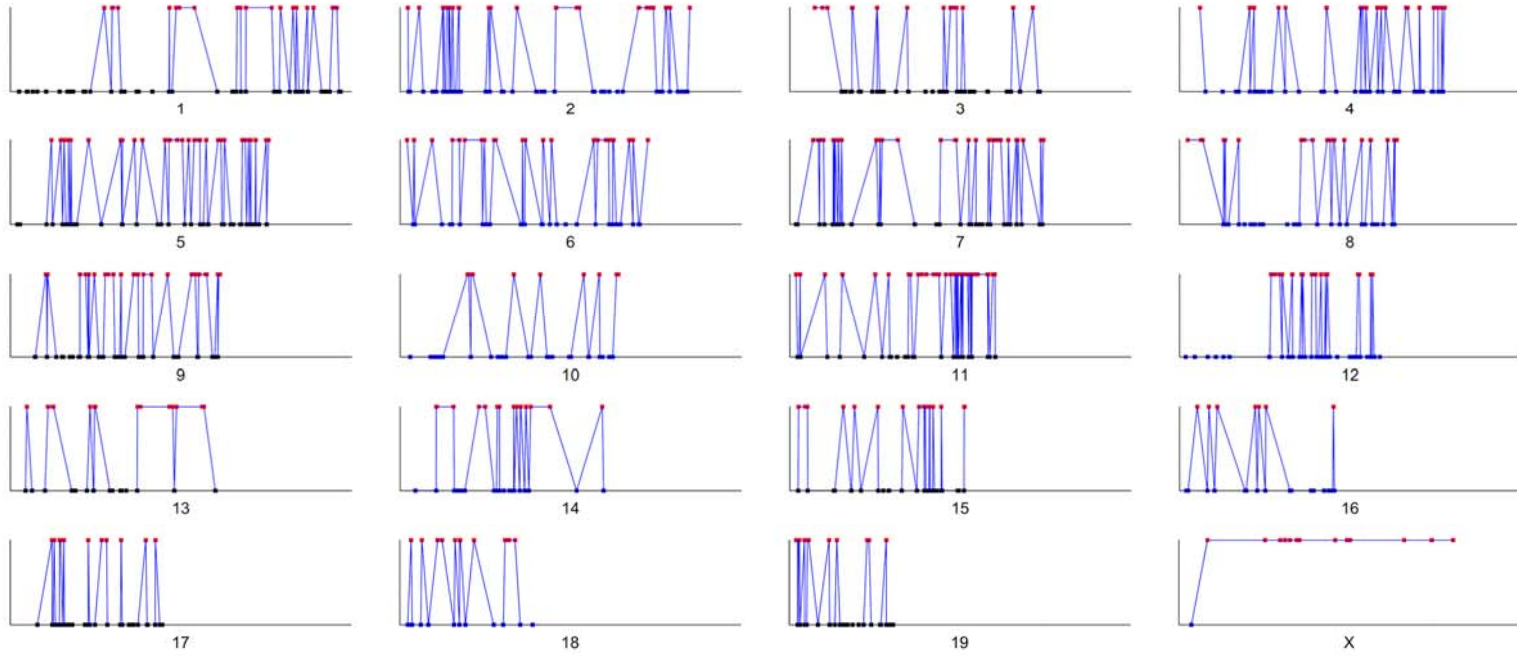

# B

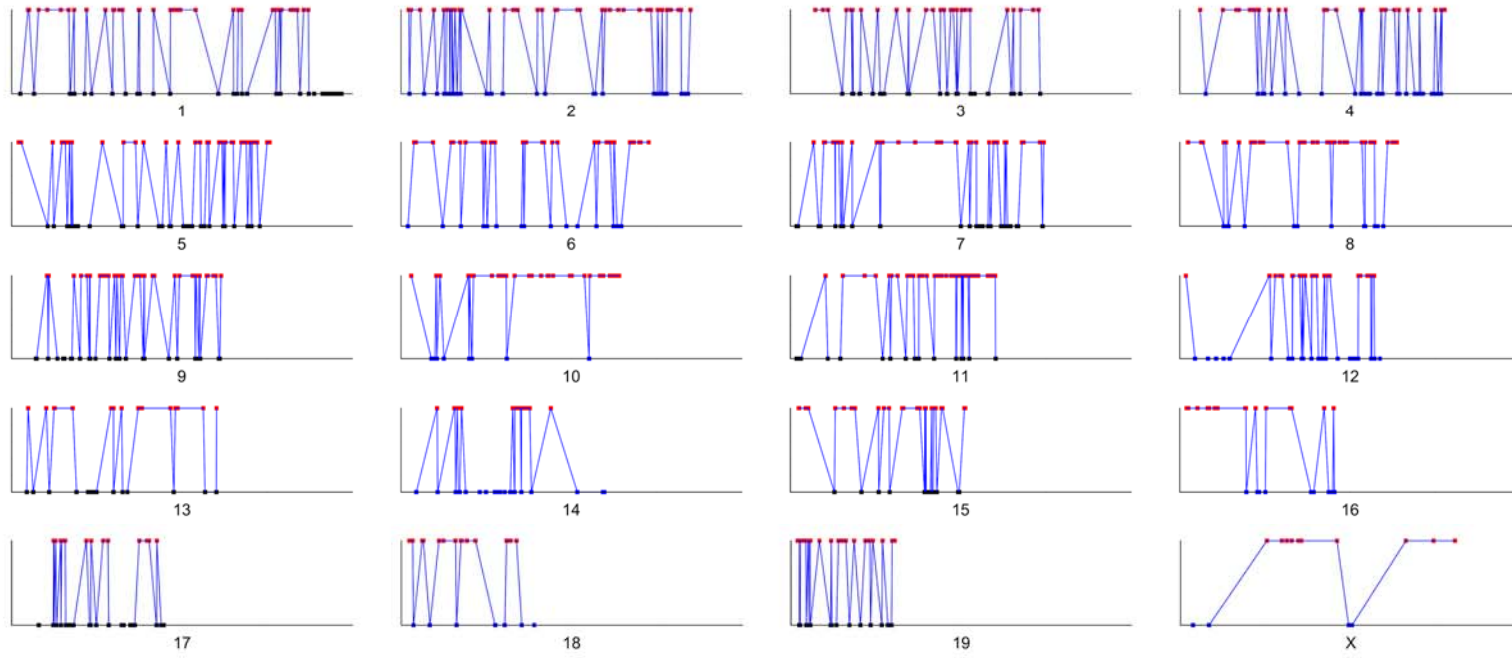

**C**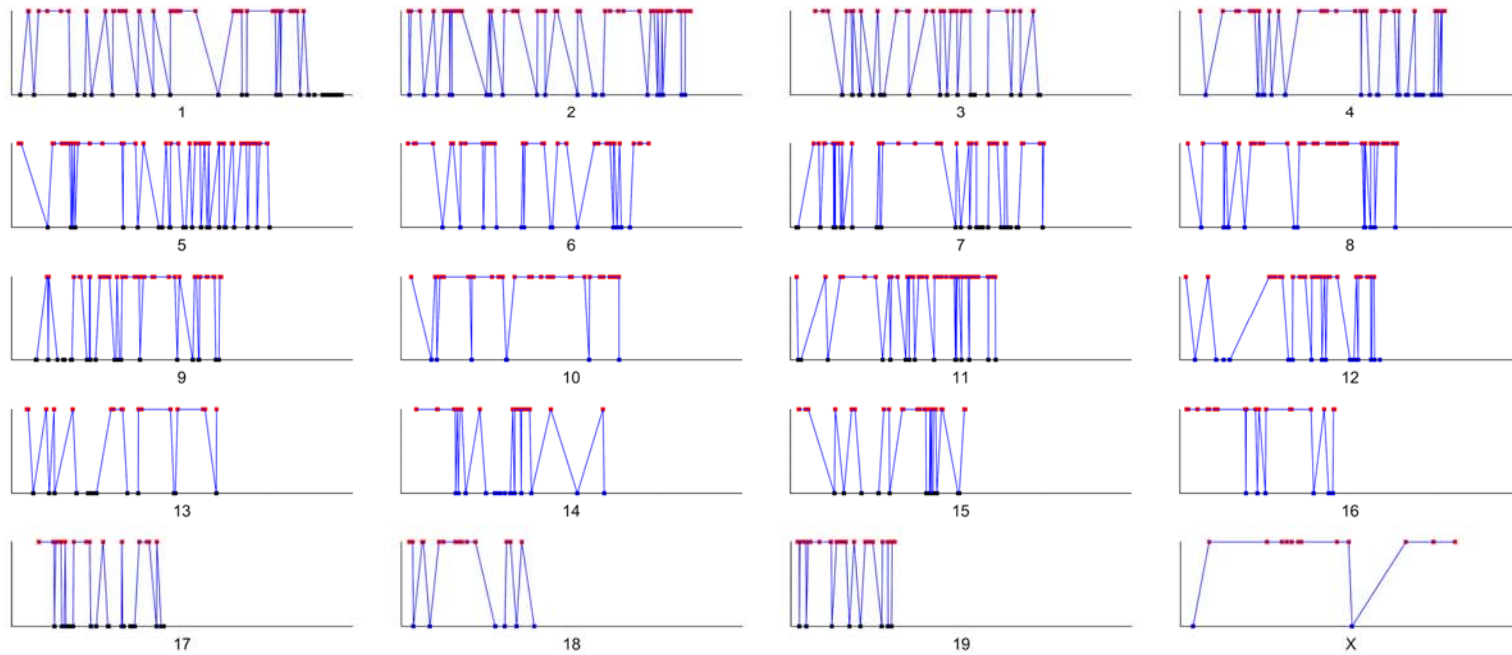

**Figure S1** Fixed differences and shared polymorphisms across the genome for all pairwise comparisons of subspecies of *Mus*. Fixed differences are shown as red dots above the axis while shared polymorphisms are shown as dots on the x axis. (A) *M. m. castaneus* and *M. m. domesticus*. (B) *M. m. castaneus* and *M. m. musculus*. (C) *M. m. domesticus* and *M. m. musculus*.

# A

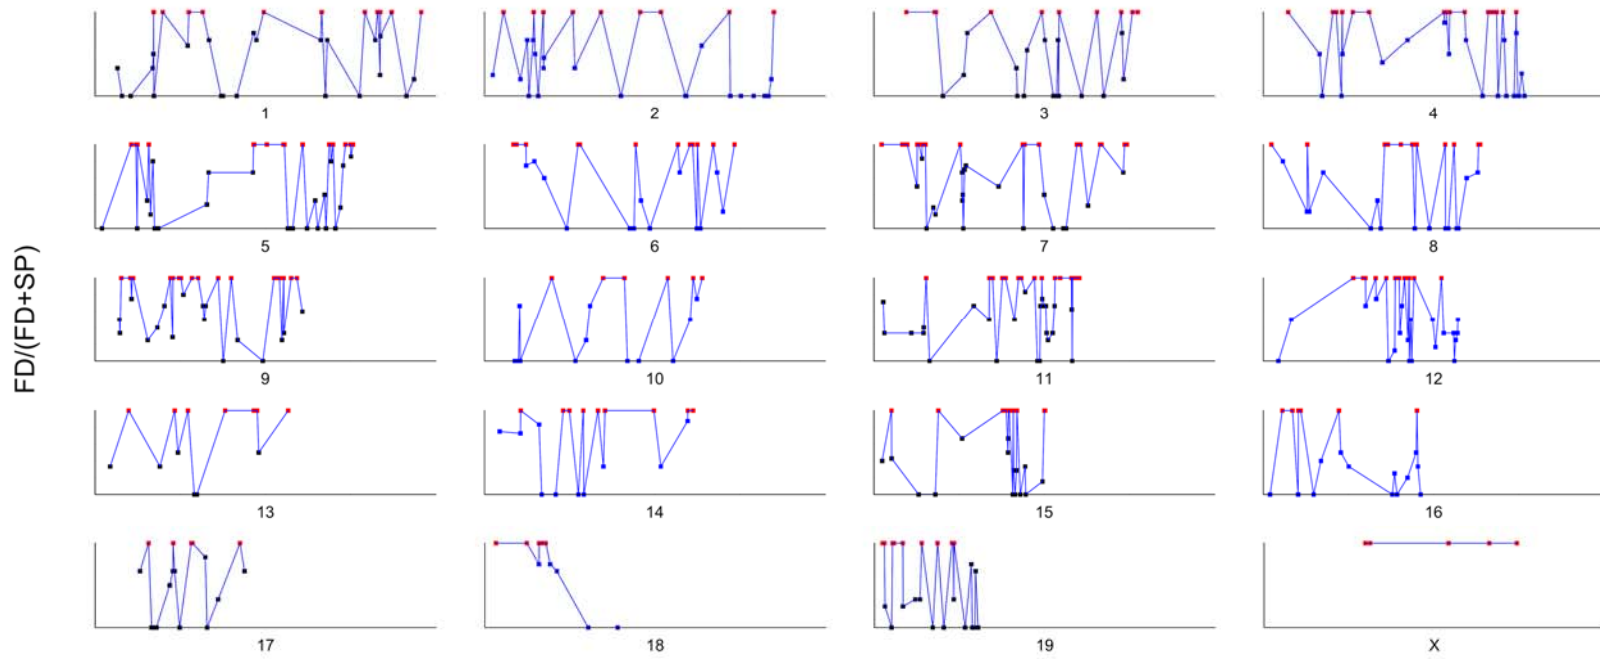

# B

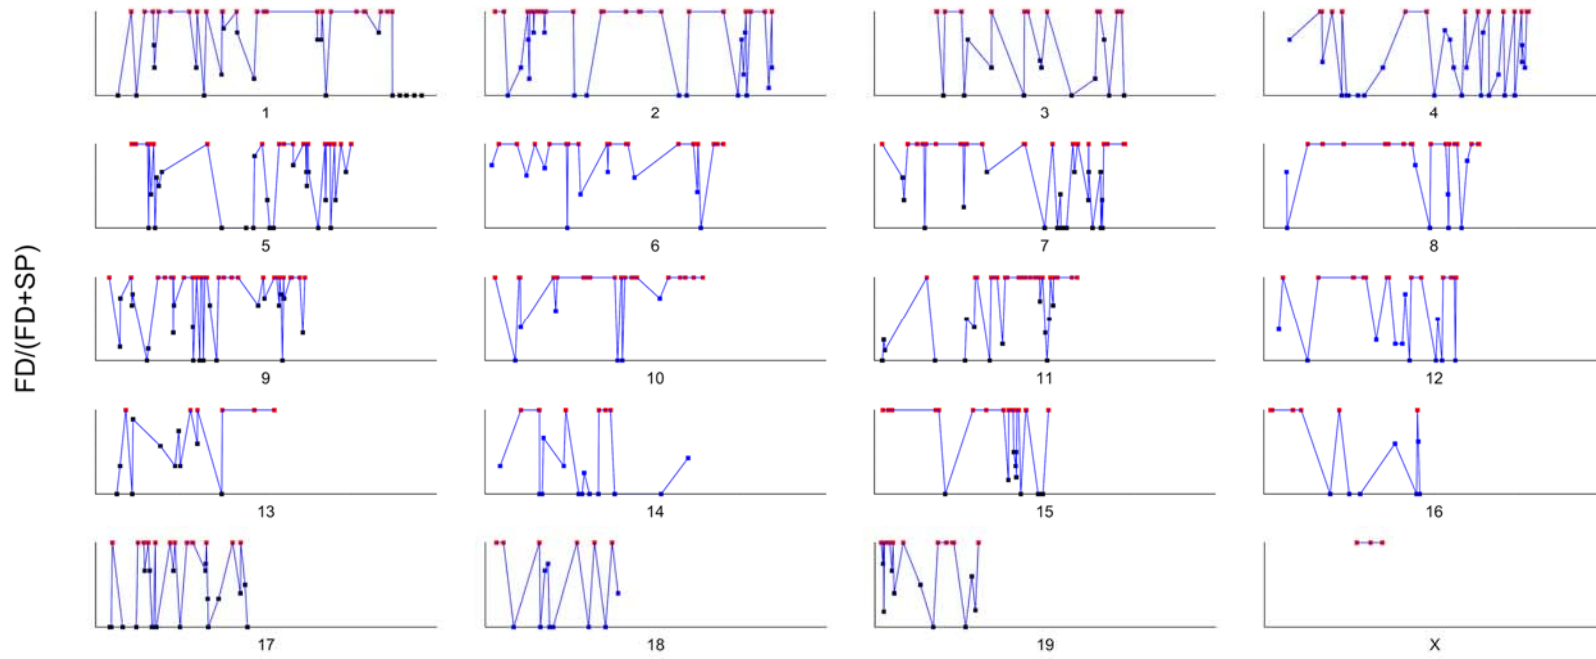

C

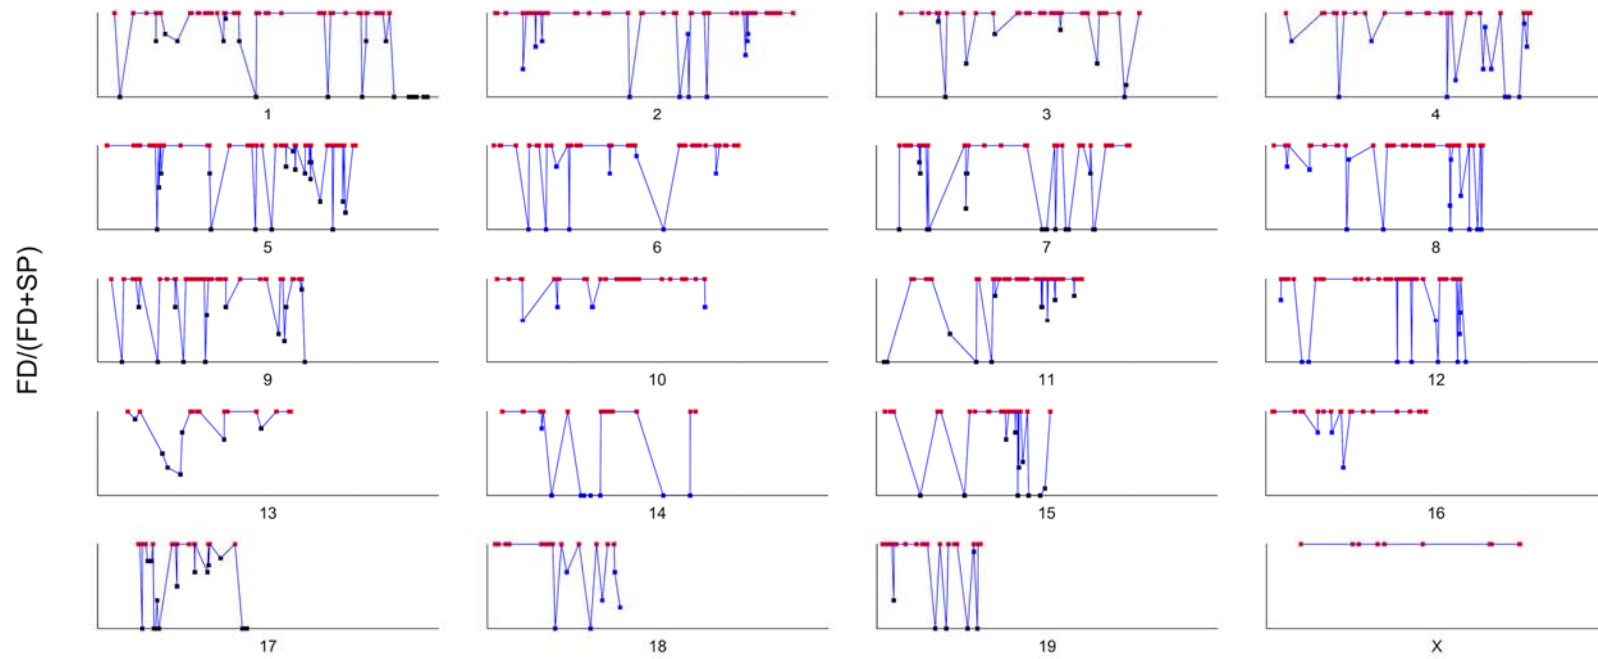

**Figure S2** The ratio of fixed differences (FDs) to topologically informative sites, fixed differences and shared polymorphisms (SPs), across the genome for all pairwise comparisons of *Mus musculus* subspecies. Dots indicate the start of each region and red dots indicate fully sorted regions. (A) *M. m. castaneus* and *M. m. domesticus*. (B) *M. m. castaneus* and *M. m. musculus*. (C) *M. m. domesticus* and *M. m. musculus*.

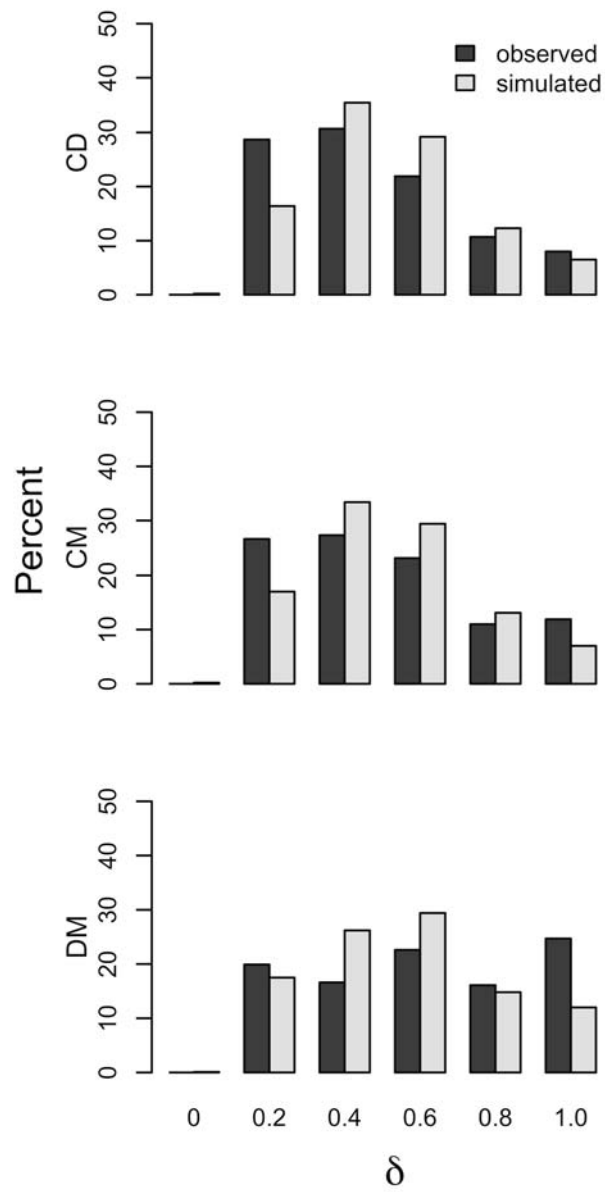

**Figure S3** The distribution of values of  $\delta$  in the observed data and in simulations based on demographic parameters from Supporting Information Table 7.

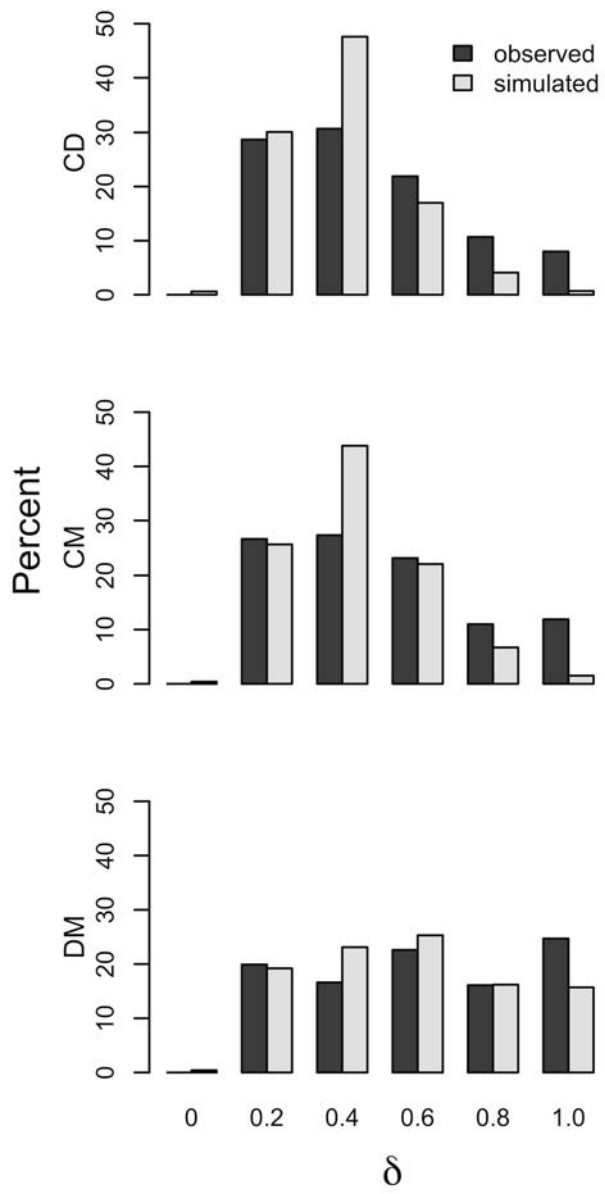

**Figure S4** The distribution of values of  $\delta$  in the observed data and in simulations based on demographic parameters from Supporting Information Table 9.



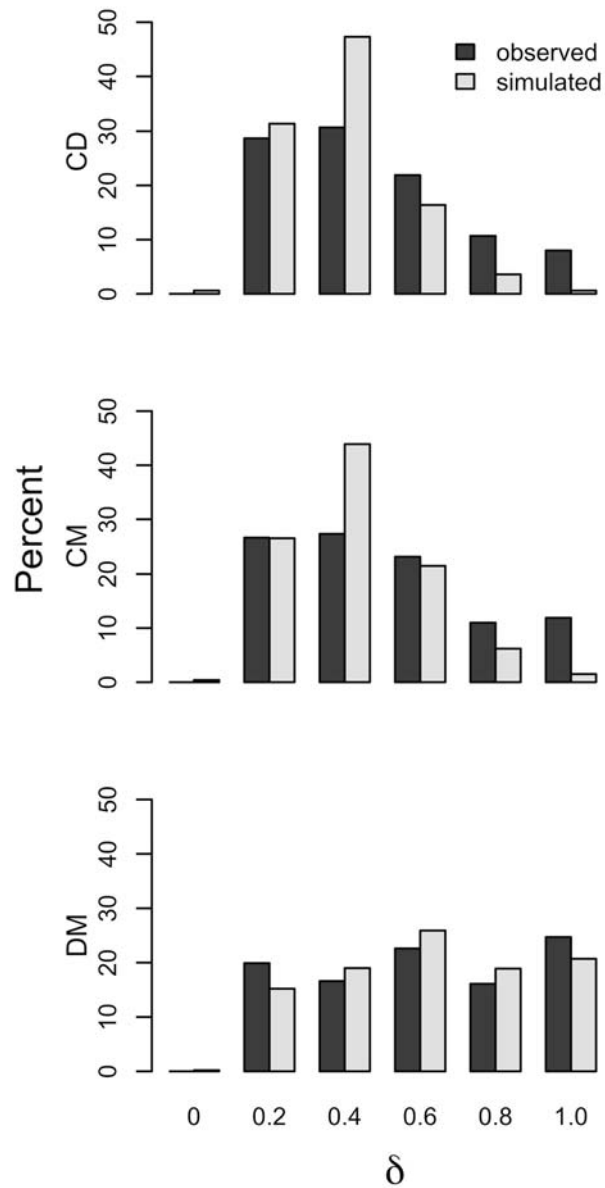

**Figure S5** The distribution of values of  $\delta$  in the observed data and in simulations based on demographic parameters from Supporting Information Table 7, but with a divergence time of 425 Kya.

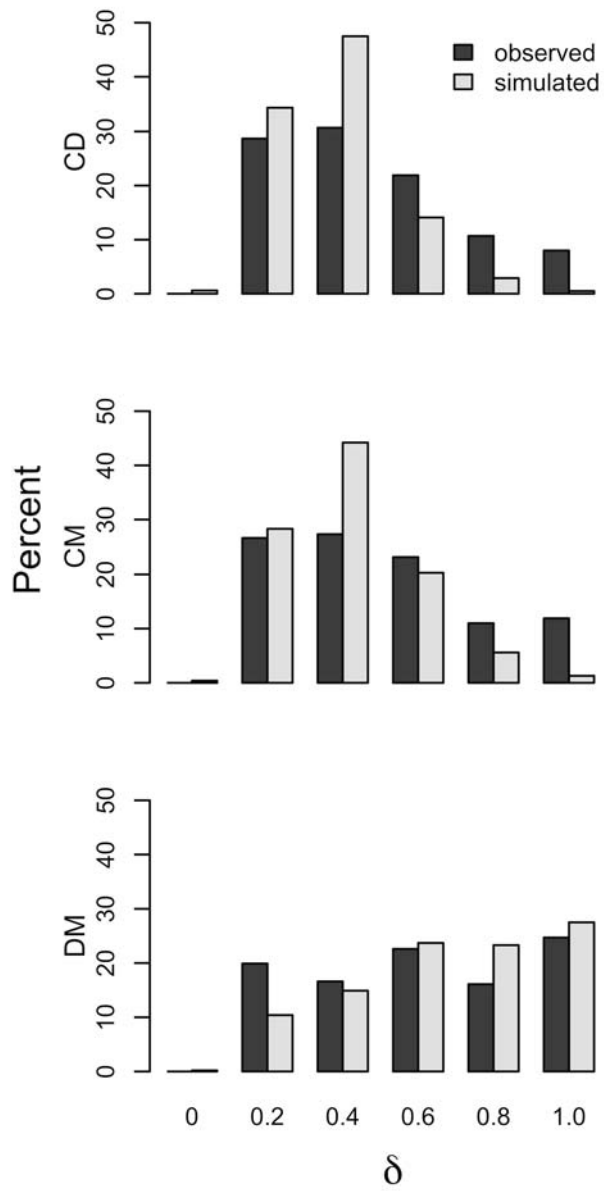

**Figure S6** The distribution of values of  $\delta$  in the observed data and in simulations based on demographic parameters from Supporting Information Table 7, but with a divergence time of 825 Kya.

**File S1**

**SNP Table**

Available for download as a .txt file at <http://www.genetics.org/lookup/suppl/doi:10.1534/genetics.114.166827/-/DC1>

## File S2

### Supplementary Methods and Results

*Measures of differentiation measured on a per SNP basis*

$\delta$  is the absolute value of the difference in minor allele frequency among populations.

$$\delta = |\text{Minor Allele Frequency}_{\text{pop1}} - \text{Minor Allele Frequency}_{\text{pop2}}|$$

$D_{xy}$  can be thought of as the number of mismatches between two sets divided by the total number of comparisons between two sets.

$$D_{XY} = \frac{(\text{Minor Allele Count}_{\text{pop1}} * \text{Major Allele Count}_{\text{pop2}}) + (\text{Major Allele Count}_{\text{pop1}} * \text{Minor Allele Count}_{\text{pop2}})}{\text{Number of Alleles}_{\text{pop1}} * \text{Number of Alleles}_{\text{pop2}}}$$

$F_{st}$  is the portion of the variance in the data that lies between two populations.

$$F_{st} = \frac{P_{i_{total}} - \overline{P_{i_{within}}}}{P_{i_{total}}}$$

$$P_{i_{total}} = \frac{\text{Minor Allele Count}_{\text{total}} * \text{Major Allele Count}_{\text{total}}}{\left(\frac{\text{Total number of Alleles}}{2}\right)}$$

$$P_{i_{within \text{ for } \text{popk}}} = \frac{\text{Minor Allele Count}_{\text{popk}} * \text{Major Allele Count}_{\text{popk}}}{\left(\frac{\text{Number of Alleles in popk}}{2}\right)}$$

*Runs of fixed differences* Another approach to evaluating differentiation across the genome is to consider runs of fixed differences. When sampling is adequate, runs of fixed differences uninterrupted by shared polymorphisms, can also identify fully sorted gene genealogies. For this analysis, we only included genes that contained at least one fixed difference or shared polymorphism from each pairwise comparison. We sampled a single SNP from each gene included in the analysis. Because we were interested in identifying highly differentiated regions, to be conservative, if a gene contained fixed differences and shared polymorphisms, the SNP included in the analysis was selected from among the shared polymorphisms. On average, “pruned” SNPs included in these analyses were ~2.19 Mbs apart. Using publicly available source code, we amended the program SLIDER (McDonald 1996) to generate a distribution of runs of fixed differences based on 10,000 Monte Carlo simulations of coalescence and recombination for each pairwise comparison. In each simulation, the observed number of polymorphisms and fixed differences were distributed randomly among sites such that the number of polymorphisms and fixed differences matched the observed data. These simulations assumed a constant  $N_e$ , uniform recombination rates among adjacent sites,

random union of gametes, point mutation, and silent site neutrality. We used data from chromosome two for these simulations as it had, on average, the largest number of topologically informative markers and is the second largest autosome (~182 Mb). We replicated 10,000 simulations over ten recombination parameters ranging from one to ten.

We identified many runs of fixed differences in all pairwise comparisons (Supporting Information Figures 1a, b, c). Consistent with the window analyses, we found that there were more runs of fixed differences in the DM comparison and that those runs were, on average, larger both in terms of number of SNPs and distance covered (Supporting Information Table 5). However, SLIDER analysis failed to reject the null model. Regardless of recombination rate, summary statistics for the distribution of runs did not fall in the extreme tails of results from simulations of coalescence and recombination (Supporting Information Table 6). The X chromosome was characterized by long runs of fixed differences in all three pairwise comparisons (Supporting Information Figures 1a, b, c).

#### *References*

McDonald J. H., 1996 Detecting non-neutral heterogeneity across a region of DNA sequence in the ratio of polymorphism to divergence. *Mol Biol Evol* 13: 253–260.

Files S3-S4

Available for download at <http://www.genetics.org/lookup/suppl/doi:10.1534/genetics.114.166827/-/DC1>

**File S3** Testis Specific Expression Table

**File S4** Genes identified as significantly differentially expressed in each pairwise comparison among subspecies of *M. musculus*

**Table S1 Sampling localities for all wild-derived inbred laboratory strains used in this study.**

| Subspecies              | Wild Derived Inbred    |                |                 |
|-------------------------|------------------------|----------------|-----------------|
|                         | Line ID                | Country        | Locality        |
| <i>M. m. castaneus</i>  | CAST/EIJ <sup>a</sup>  | Thailand       | Thonburi        |
|                         | CIM/MPL                | India          | Masinagudi      |
|                         | CKN/MPL                | Kenya          | Nairobi         |
|                         | CKS/MPL                | Kenya          | Shanzu          |
|                         | CTP/MPL <sup>b</sup>   | Thailand       | Pathumthani     |
|                         | DKN/MPL                | Kenya          | Nairobi         |
|                         | MDG/MPL                | Madagascar     | Manakasina      |
|                         | MPR/MPL <sup>b</sup>   | Pakistan       | Rawalpindi      |
| <i>M. m. domesticus</i> | BIK/MPL                | Israel         | Kefar Galim     |
|                         | BZO/MPL                | Algeria        | Oran            |
|                         | DCP/MPL                | Cyprus         | Paphos          |
|                         | DJO/MPL                | Italy          | Orcetto         |
|                         | DMZ/MPL                | Morocco        | Azemmour        |
|                         | LEWES/EIJ              | USA            | Delaware        |
|                         | WLA/MPL                | France         | Toulouse        |
|                         | WSB/EIJ <sup>a</sup>   | USA            | Maryland        |
| <i>M. m. musculus</i>   | BID/MPL <sup>b</sup>   | Iran           | Birdjand        |
|                         | CZECHII/EIJ            | Czechoslovakia |                 |
|                         | MBK/MPL                | Bulgaria       | Kranevo         |
|                         | MBT/MPL                | Bulgaria       | Général Toshevo |
|                         | MCZ/MPL                | Czech Republic | Bialowieza      |
|                         | MDH/MPL                | Denmark        | Hov             |
|                         | MPB/MPL                | Poland         | Prague          |
|                         | PWK/PhJ <sup>c</sup>   | Czech Republic | Lhotka          |
| <i>M. caroli</i>        | CAROLI/EIJ             | Thailand       |                 |
| <i>M. spretus</i>       | SPRET/EIJ <sup>c</sup> | Spain          | Cadiz           |

<sup>a</sup>Data were taken from the Wellcome Trust Mouse Genomes Project.

<sup>b</sup>Data were excluded from further analyses due to admixture.

<sup>c</sup>Data from transcriptome sequencing was combined with data from the Wellcome Trust Mouse Genomes Project.

**Table S2 Short read transcriptome sequencing yields in megabases for all wild-derived inbred lines included in the study.**

| Subspecies              | Line        | Sequenced | Mapped | Mapped Uniquely | 6X high quality sequence |
|-------------------------|-------------|-----------|--------|-----------------|--------------------------|
| <i>M. m. castaneus</i>  | CIM         | 1,330.84  | 712    | 377             | 16.63                    |
|                         | CKN         | 1,122.00  | 631    | 324             | 14.13                    |
|                         | CKS         | 869.97    | 453    | 273             | 12.01                    |
|                         | CTP         | 968.65    | 533    | 302             | 13.76                    |
|                         | DKN         | 1,189.87  | 671    | 341             | 14.85                    |
|                         | MDG         | 1,113.24  | 596    | 319             | 14.03                    |
|                         | MPR         | 1,190.66  | 621    | 334             | 15.41                    |
| <i>M. m. domesticus</i> | BIK/MPL     | 998.97    | 543    | 296             | 13.42                    |
|                         | BZO/MPL     | 1,014.07  | 588    | 333             | 15.02                    |
|                         | DCP/MPL     | 1,489.47  | 799    | 380             | 16.55                    |
|                         | DJO/MPL     | 1,169.41  | 631    | 324             | 14.39                    |
|                         | DMZ/MPL     | 1,397.35  | 776    | 376             | 16.85                    |
|                         | LEWES/EIJ   | 3,640.53  | 1,585  | 573             | 22.69                    |
|                         | WLA/MPL     | 1,241.30  | 652    | 324             | 14.25                    |
| <i>M. m. musculus</i>   | BID/MPL     | 863.31    | 486    | 288             | 13.3                     |
|                         | CZECHII/EIJ | 1,237.15  | 716    | 375             | 16.93                    |
|                         | MBK/MPL     | 1,005.21  | 546    | 295             | 13.01                    |
|                         | MBT/MPL     | 1,651.32  | 931    | 444             | 19.16                    |
|                         | MCZ/MPL     | 1,574.79  | 977    | 474             | 19.86                    |
|                         | MDH/MPL     | 1,127.44  | 663    | 355             | 15.53                    |
|                         | MPB/MPL     | 801.8     | 488    | 287             | 12.85                    |
|                         | PWK/PhJ     | 1,675.66  | 1,048  | 496             | 21.25                    |
| <i>M. caroli</i>        | CAROLI/EIJ  | 3,063.49  | 1,442  | 596             | 21.68                    |
| <i>M. spretus</i>       | SPRET/EIJ   | 1,921.25  | 1,092  | 513             | 21.85                    |



**Table S3 Summary data from comparisons of genotype data in coding regions collected by this study and data collected by the Wellcome Trust.**

| Inbred Line | Bases in<br>common | Mismatches | % mismatch |
|-------------|--------------------|------------|------------|
| PWK         | 13,019,770         | 40         | 0.0003     |
| SPRET       | 13,547,788         | 32         | 0.0002     |

**Table S4** The results of a STRUCTURE analysis to determine the probability of different numbers of populations (K) within wild-derived inbred lines sampled from the three subspecies of *M. musculus* after the removal of lines found to be highly admixed in previous runs of STRUCTURE.

| Model        | K              | Average    |        |
|--------------|----------------|------------|--------|
|              |                | ln Pr(X K) | Pr(K)  |
| Admixture    | 1              | -15937.8   | <0.001 |
| Admixture    | 2              | -12492.3   | <0.001 |
| Admixture    | 3 <sup>a</sup> | -8918.2    | >0.999 |
| Admixture    | 4              | -9648.40   | <0.001 |
| Admixture    | 5              | -9603.07   | <0.001 |
| No admixture | 1              | -15932.5   | <0.001 |
| No admixture | 2              | -11890.1   | <0.001 |
| No admixture | 3 <sup>a</sup> | -8879.2    | >0.999 |
| No admixture | 4              | -10641.9   | <0.001 |
| No admixture | 5              | -9059.4    | <0.001 |

<sup>a</sup>In these runs, the lines assigned to the three clusters were consistent with our subspecies assignment as shown in Supporting Information Table 1.

**Table S5 Summary statistics describing runs of fixed differences in pairwise comparisons among subspecies of *Mus musculus*.**

| Subspecies 1            | Subspecies 2            | Chr Type  | n   | Avg. # SNPs/run<br>(SD) | Max # of<br>SNPs/run | Avg. Mb covered<br>(SD) | Max Mb<br>covered (SD) |
|-------------------------|-------------------------|-----------|-----|-------------------------|----------------------|-------------------------|------------------------|
| <i>M. m. castaneus</i>  | <i>M. m. domesticus</i> | Autosomes | 98  | 3.07 (1.82)             | 17                   | 3.22 (4.14)             | 20.71                  |
|                         |                         | X         | 1   | 14 (-)                  | (-)                  | 144.19                  | (-)                    |
| <i>M. m. castaneus</i>  | <i>M. m. musculus</i>   | Autosomes | 138 | 4.09 (2.59)             | 19                   | 5.87 (7.59)             | 44.23                  |
|                         |                         | X         | 2   | 5.5 (2.12)              | 41.5                 | 34.96 (8.75)            | 41.5                   |
| <i>M. m. domesticus</i> | <i>M. m. musculus</i>   | Autosomes | 144 | 4.55 (2.75)             | 19                   | 7.17 (8.29)             | 40.99                  |
|                         |                         | X         | 2   | 6.5 (2.54)              | 9                    | 55.30 (37.51)           | 81.83                  |

**Table S6 Summary statistics describing runs of fixed differences on chromosome 2 in all pairwise comparisons of the subspecies of *Mus musculus* as well as the percentile rank of those statistics in 10,000 coalescent and recombination simulations.**

| Subspecies              | Subspecies              | # of runs | Perc. Rank | Avg. # of SNPs/run (SD) | Perc. Rank | Max # of SNPs/run | Perc. Rank |
|-------------------------|-------------------------|-----------|------------|-------------------------|------------|-------------------|------------|
| <i>M. m. castaneus</i>  | <i>M. m. domesticus</i> | 9         | 75%        | 2.89 (1.54)             | 67%        | 6                 | 73%        |
| <i>M. m. castaneus</i>  | <i>M. m. musculus</i>   | 11        | 30%        | 3.91 (2.07)             | 66%        | 8                 | 39%        |
| <i>M. m. domesticus</i> | <i>M. m. musculus</i>   | 12        | 49%        | 4.67 (3.31)             | 50%        | 12                | 52%        |

**Table S7 Demographic parameters used in ms (Hudson 2002) simulations. All values are based on averages of estimates from Geraldès *et al.* (2011) and assume a generation length of 1 year.**

| Subspecies 1            | Subspecies 2            | $N_{e \text{ species 1}}$ | $N_{e \text{ species 2}}$ | $N_{e \text{ Ancestral}}$ | $t$     | 2Nm<br>(species1) <sup>a</sup> | 2Nm<br>(species2) <sup>b</sup> | Avg. # SNPs<br>surveyed in<br>observed loci<br>(SD) | Avg. # SNPs in<br>simulated loci<br>(SD) |
|-------------------------|-------------------------|---------------------------|---------------------------|---------------------------|---------|--------------------------------|--------------------------------|-----------------------------------------------------|------------------------------------------|
| <i>M. m. castaneus</i>  | <i>M. m. domesticus</i> | 366,700                   | 82,600                    | 277,800                   | 313,800 | 0.193                          | 0.000                          | 2.61 (2.39)                                         | 5.28 (3.05)                              |
| <i>M. m. castaneus</i>  | <i>M. m. musculus</i>   | 366,700                   | 36,600                    | 277,800                   | 345,800 | 0.190                          | 0.058                          | 2.59 (2.36)                                         | 4.90 (2.93)                              |
| <i>M. m. domesticus</i> | <i>M. m. musculus</i>   | 82,600                    | 36,600                    | 277,800                   | 320,800 | 0.003                          | 0.057                          | 2.38 (2.08)                                         | 2.24 (1.29)                              |

<sup>a</sup>The effective rate at which genes enter subspecies 1 from subspecies 2.

<sup>b</sup>The effective rate at which genes enter subspecies 2 from subspecies 1.

**Table S8** Average values of  $\delta$  for different classes of sites in all pairwise comparisons between subspecies of *M. musculus*.

| Subspecies 1            | Subspecies 2            | $\bar{\delta}_{non-synonymous}$ (SD) | $n_{non-synonymous}$ | $\bar{\delta}_{synonymous}$ SD | $n_{synonymous}$ | $P^a$   |
|-------------------------|-------------------------|--------------------------------------|----------------------|--------------------------------|------------------|---------|
| <i>M. m. castaneus</i>  | <i>M. m. domesticus</i> | 0.39 (0.30)                          | 7,118                | 0.40 (0.29)                    | 16,772           | <0.001  |
| <i>M. m. castaneus</i>  | <i>M. m. musculus</i>   | 0.42 (0.31)                          | 6,965                | 0.43 (0.30)                    | 16,503           | <0.0001 |
| <i>M. m. domesticus</i> | <i>M. m. musculus</i>   | 0.48 (0.35)                          | 6,740                | 0.54 (0.35)                    | 14,687           | <0.0001 |

<sup>a</sup>Results of *t*-tests comparing average measures of differentiation for non-synonymous and synonymous sites

**Table S9 Demographic parameters used in ms (Hudson 2002) simulations intended to more closely match the number of SNPs surveyed in the observed data.**

| Subspecies 1            | Subspecies 2            | $N_{e \text{ species 1}}$ | $N_{e \text{ species 2}}$ | $N_{e \text{ Ancestral}}$ | $t$     | 2Nm<br>(species1) <sup>a</sup> | 2Nm<br>(species2) <sup>b</sup> | Avg. # SNPs                          | Avg. # SNPs in         |
|-------------------------|-------------------------|---------------------------|---------------------------|---------------------------|---------|--------------------------------|--------------------------------|--------------------------------------|------------------------|
|                         |                         |                           |                           |                           |         |                                |                                | surveyed in<br>observed loci<br>(SD) | simulated loci<br>(SD) |
| <i>M. m. castaneus</i>  | <i>M. m. domesticus</i> | 167,000                   | 101,000                   | 280,000                   | 325,000 | 0.193                          | 0.000                          | 2.61 (2.39)                          | 3.34 (1.93)            |
| <i>M. m. castaneus</i>  | <i>M. m. musculus</i>   | 167,000                   | 89,000                    | 280,000                   | 325,000 | 0.190                          | 0.058                          | 2.59 (2.36)                          | 3.28 (1.90)            |
| <i>M. m. domesticus</i> | <i>M. m. musculus</i>   | 101,000                   | 89,000                    | 280,000                   | 325,000 | 0.003                          | 0.057                          | 2.38 (2.08)                          | 2.65 (1.52)            |

<sup>a</sup>The effective rate at which genes enter subspecies 1 from subspecies 2.

<sup>b</sup>The effective rate at which genes enter subspecies 2 from subspecies 1.

**Table S10 Demographic parameters used in ms (Hudson 2002) simulations. Population size estimates are based on averages of estimates from Geraldès *et al.* (2011) and assume a generation length of 1 year. Gene flow was increased until the proportion of simulated loci with low average values of differentiation matched observed proportions.**

| Subspecies 1            | Subspecies 2            | $N_e$ species 1 | $N_e$ species 2 | $N_e$ Ancestral | $t$     | 2Nm<br>(species1) <sup>a</sup> | 2Nm<br>(species2) <sup>b</sup> |
|-------------------------|-------------------------|-----------------|-----------------|-----------------|---------|--------------------------------|--------------------------------|
| <i>M. m. castaneus</i>  | <i>M. m. domesticus</i> | 366,700         | 82,600          | 277,800         | 325,000 | 1.930                          | 0.000                          |
| <i>M. m. castaneus</i>  | <i>M. m. musculus</i>   | 366,700         | 36,600          | 277,800         | 325,000 | 1.330                          | 0.406                          |
| <i>M. m. domesticus</i> | <i>M. m. musculus</i>   | 82,600          | 36,600          | 277,800         | 325,000 | 0.045                          | 0.855                          |

<sup>a</sup>The effective rate at which genes enter subspecies 1 from subspecies 2

<sup>b</sup>The effective rate at which genes enter subspecies 2 from subspecies 1



**Table S11** Overlap between inversions and runs of fixed differences identified between each pair of subspecies of *Mus musculus*.

| Subspecies              | Subspecies              | # of runs of fixed differences | Observed overlap with inversions | Perc. Rank |
|-------------------------|-------------------------|--------------------------------|----------------------------------|------------|
| <i>M. m. castaneus</i>  | <i>M. m. domesticus</i> | 99                             | 36                               | 35%        |
| <i>M. m. castaneus</i>  | <i>M. m. musculus</i>   | 140                            | 70                               | 54%        |
| <i>M. m. domesticus</i> | <i>M. m. musculus</i>   | 146                            | 80                               | 98.5%      |

**Table S12 Average measures of differentiation in regions containing testis specific genes and all other regions for all pairwise comparisons of *Mus musculus* subspecies.**

| Subspecies              | Subspecies              | Regions                       | n    | $\bar{F}_{st}$ (SD) | t     | $\bar{D}_{xy}$ (SD) | t     | $\bar{\delta}$ (SD) | t     |
|-------------------------|-------------------------|-------------------------------|------|---------------------|-------|---------------------|-------|---------------------|-------|
| <i>M. m. castaneus</i>  | <i>M. m. domesticus</i> | Contain testis specific genes | 520  | 0.24 (0.16)         | 0.41  | 0.42 (0.14)         | 0.29  | 0.41 (0.14)         | 0.16  |
|                         |                         | All Others                    | 1226 | 0.24 (0.19)         |       | 0.42 (0.16)         |       | 0.41 (0.16)         |       |
| <i>M. m. castaneus</i>  | <i>M. m. musculus</i>   | Contain testis specific genes | 515  | 0.29 (0.19)         | 1.73* | 0.47 (0.15)         | 1.47  | 0.46 (0.16)         | 1.64* |
|                         |                         | All Others                    | 1247 | 0.27 (0.20)         |       | 0.45 (0.16)         |       | 0.44 (0.17)         |       |
| <i>M. m. domesticus</i> | <i>M. m. musculus</i>   | Contain testis specific genes | 518  | 0.43 (0.22)         | 2.15* | 0.56 (0.18)         | 1.81* | 0.56 (0.18)         | 1.93* |
|                         |                         | All Others                    | 1364 | 0.41 (0.24)         |       | 0.55 (0.19)         |       | 0.54 (0.20)         |       |

\*P<=0.05 in 1-sided t-tests comparing measures from regions containing testis specific regions and all others.

**Table S13 Genes identified in regions of overlap between the results of QTL mapping and our study in comparisons between *M. m. castaneus* and *M. m. domesticus*.**

| Ensembl Gene ID                 | Chr | Gene Start (bp) | Gene End (bp) | Associated Gene Name |
|---------------------------------|-----|-----------------|---------------|----------------------|
| ENSMUSG00000005510              | 2   | 90734791        | 90744984      | <i>Ndufs3</i>        |
| ENSMUSG00000005505              | 2   | 90744897        | 90751783      | <i>Kbtbd4</i>        |
| ENSMUSG00000005506              | 2   | 90780539        | 90859654      | <i>Celf1</i>         |
| ENSMUSG00000002104              | 2   | 90875777        | 90885886      | <i>Rapsn</i>         |
| ENSMUSG00000002102 <sup>a</sup> | 2   | 90894166        | 90906526      | <i>Psmc3</i>         |
| ENSMUSG00000002105              | 2   | 90901948        | 90910574      | <i>Slc39a13</i>      |
| ENSMUSG00000002111              | 2   | 90922547        | 90955913      | <i>Spi1</i>          |
| ENSMUSG00000002100              | 2   | 90958301        | 90976673      | <i>Mybpc3</i>        |
| ENSMUSG000000040687             | 2   | 90977517        | 91023994      | <i>Madd</i>          |
| ENSMUSG00000002108              | 2   | 91024218        | 91042991      | <i>Nr1h3</i>         |
| ENSMUSG00000002103              | 2   | 91043042        | 91054255      | <i>Acp2</i>          |
| ENSMUSG00000002109              | 2   | 91051729        | 91077139      | <i>Ddb2</i>          |
| ENSMUSG00000027257              | 2   | 91096111        | 91104836      | <i>Pacsin3</i>       |
| ENSMUSG00000027255              | 2   | 91105131        | 91117088      | <i>Arfgap2</i>       |
| ENSMUSG00000027253              | 2   | 91297668        | 91354058      | <i>Lrp4</i>          |
| ENSMUSG000000040549             | 2   | 91366919        | 91460821      | <i>Ckap5</i>         |
| ENSMUSG00000027249              | 2   | 91465477        | 91476571      | <i>F2</i>            |
| ENSMUSG00000075040              | 2   | 91483826        | 91489948      | <i>Zfp408</i>        |
| ENSMUSG00000027247              | 2   | 91490017        | 91512483      | <i>Arhgap1</i>       |
| ENSMUSG000000040591             | 2   | 91275068        | 91444704      | <i>1110051M20Rik</i> |
| ENSMUSG00000027244              | 2   | 91514775        | 91550733      | <i>Atg13</i>         |
| ENSMUSG00000027243              | 2   | 91551009        | 91561702      | <i>Harbi1</i>        |
| ENSMUSG000000040506             | 2   | 91570291        | 91759006      | <i>Ambra1</i>        |
| ENSMUSG000000040495             | 2   | 91762346        | 91769986      | <i>Chrm4</i>         |
| ENSMUSG00000027239              | 2   | 91769962        | 91772454      | <i>Mdk</i>           |
| ENSMUSG000000040479             | 2   | 91772981        | 91816021      | <i>Dgkz</i>          |
| ENSMUSG000000095332             | 2   | 91785862        | 91786173      | <i>Gm9821</i>        |
| ENSMUSG00000027230              | 2   | 91815044        | 91864659      | <i>Creb3l1</i>       |
| ENSMUSG00000058318              | 2   | 91933274        | 92204823      | <i>Phf21a</i>        |
| ENSMUSG00000027293              | 2   | 119914911       | 119980342     | <i>Ehd4</i>          |
| ENSMUSG00000050211              | 2   | 119992148       | 120071071     | <i>Pla2g4e</i>       |
| ENSMUSG00000070719              | 2   | 120091331       | 120114933     | <i>Pla2g4d</i>       |
| ENSMUSG000000046971             | 2   | 120125693       | 120139901     | <i>Pla2g4f</i>       |
| ENSMUSG00000027291              | 2   | 120142197       | 120178873     | <i>Vps39</i>         |
| ENSMUSG00000033808              | 2   | 120181045       | 120229852     | <i>Tmem87a</i>       |
| ENSMUSG000000062646             | 2   | 120229632       | 120287436     | <i>Ganc</i>          |
| ENSMUSG00000079110              | 2   | 120281755       | 120330649     | <i>Capn3</i>         |
| ENSMUSG00000027288              | 2   | 120332556       | 120389579     | <i>Zfp106</i>        |
| ENSMUSG000000027287             | 2   | 120393407       | 120426991     | <i>Snap23</i>        |
| ENSMUSG00000027286 <sup>a</sup> | 2   | 120429974       | 120435256     | <i>Lrrc57</i>        |
| ENSMUSG00000027285              | 2   | 120435119       | 120447296     | <i>Haus2</i>         |
| ENSMUSG00000033705              | 2   | 120454862       | 120557633     | <i>Stard9</i>        |
| ENSMUSG00000027284              | 2   | 120541890       | 120675864     | <i>Cdan1</i>         |
| ENSMUSG00000090100 <sup>a</sup> | 2   | 120558552       | 120676340     | <i>Ttbk2</i>         |
| ENSMUSG00000027272              | 2   | 120686005       | 120796451     | <i>Ubr1</i>          |
| ENSMUSG000000054484             | 2   | 120802753       | 120833588     | <i>Tmem62</i>        |
| ENSMUSG00000023572              | 2   | 120834139       | 120842640     | <i>Ccndbp1</i>       |
| ENSMUSG00000023216              | 2   | 120843627       | 120862808     | <i>Epb4.2</i>        |
| ENSMUSG000000053675             | 2   | 120871847       | 120911577     | <i>Tgm5</i>          |
| ENSMUSG00000079103              | 2   | 120919301       | 120935531     | <i>Tgm7</i>          |

<sup>a</sup>indicates genes that are testis-specific.

Table S13. cont'd.

| Ensembl Gene ID                 | Chr | Gene Start<br>(bp) | Gene End<br>(bp) | Associated Gene<br>Name |
|---------------------------------|-----|--------------------|------------------|-------------------------|
| ENSMUSG00000074890              | 2   | 120954043          | 120966434        | <i>Lcmt2</i>            |
| ENSMUSG00000027259              | 2   | 120966164          | 120982416        | <i>Adal</i>             |
| ENSMUSG00000050619              | 2   | 120984009          | 120996861        | <i>Zscan29</i>          |
| ENSMUSG00000027263              | 2   | 120996390          | 121024506        | <i>Tubgcp4</i>          |
| ENSMUSG00000043909              | 2   | 121019017          | 121097143        | <i>Trp53bp1</i>         |
| ENSMUSG00000027254              | 2   | 121115336          | 121136568        | <i>Map1a</i>            |
| ENSMUSG00000033526              | 2   | 121136297          | 121181132        | <i>Ppip5k1</i>          |
| ENSMUSG00000000308              | 2   | 121183450          | 121189473        | <i>Ckmt1</i>            |
| ENSMUSG00000033498              | 2   | 121189464          | 121212904        | <i>Strc</i>             |
| ENSMUSG00000033486 <sup>a</sup> | 2   | 121218367          | 121240317        | <i>Catsper2</i>         |
| ENSMUSG00000027248              | 2   | 121239511          | 121264423        | <i>Pdia3</i>            |
| ENSMUSG00000027246              | 2   | 121264746          | 121270014        | <i>Ell3</i>             |
| ENSMUSG00000046110              | 2   | 121264795          | 121282517        | <i>Serinc4</i>          |
| ENSMUSG00000074884              | 2   | 121274931          | 121284049        | <i>Serf2</i>            |
| ENSMUSG00000027245              | 2   | 121279026          | 121284408        | <i>Hypk</i>             |
| ENSMUSG00000048222              | 2   | 121285971          | 121299803        | <i>Mfap1b</i>           |
| ENSMUSG00000068479              | 2   | 121317647          | 121332401        | <i>Mfap1a</i>           |
| ENSMUSG00000027242              | 2   | 121332459          | 121370596        | <i>Wdr76</i>            |
| ENSMUSG00000027238              | 2   | 121371265          | 121632823        | <i>Frmd5</i>            |
| ENSMUSG00000060227              | 2   | 121692706          | 121761956        | <i>Casc4</i>            |
| ENSMUSG00000074881              | 2   | 121779488          | 121781096        | <i>Mageb3</i>           |
| ENSMUSG00000033411              | 2   | 121781737          | 121839378        | <i>Ctdspl2</i>          |
| ENSMUSG00000027236 <sup>a</sup> | 2   | 121854282          | 121882334        | <i>Eif3j1</i>           |
| ENSMUSG00000033396              | 2   | 121879256          | 121944122        | <i>Spg11</i>            |
| ENSMUSG00000027233              | 2   | 121945844          | 122011925        | <i>Patl2</i>            |
| ENSMUSG00000060802              | 2   | 121973422          | 121978819        | <i>B2m</i>              |
| ENSMUSG00000033368 <sup>a</sup> | 2   | 121986436          | 122004763        | <i>Trim69</i>           |
| ENSMUSG00000027229              | 2   | 122012008          | 122032133        | <i>4933406J08Rik</i>    |
| ENSMUSG00000027227 <sup>a</sup> | 2   | 122060485          | 122091076        | <i>Sord</i>             |
| ENSMUSG00000068452              | 2   | 122104983          | 122124185        | <i>Duox2</i>            |
| ENSMUSG00000027225              | 2   | 122124636          | 122128621        | <i>Duoxa2</i>           |
| ENSMUSG00000027224              | 2   | 122127927          | 122139466        | <i>Duoxa1</i>           |
| ENSMUSG00000033268              | 2   | 122141408          | 122173708        | <i>Duox1</i>            |
| ENSMUSG00000033256              | 2   | 122174628          | 122194898        | <i>Shf</i>              |
| ENSMUSG00000027219              | 2   | 122251126          | 122286873        | <i>Slc28a2</i>          |
| ENSMUSG00000079071              | 2   | 122310677          | 122353776        | <i>Gm14085</i>          |
| ENSMUSG00000073889              | 4   | 41647021           | 41716347         | <i>Il1ra1</i>           |
| ENSMUSG00000028447              | 4   | 41661830           | 41670202         | <i>Dctn3</i>            |
| ENSMUSG00000066224              | 4   | 41670868           | 41678174         | <i>Arid3c</i>           |
| ENSMUSG00000036078              | 4   | 41685366           | 41703030         | <i>Sigmar1</i>          |
| ENSMUSG00000036073              | 4   | 41702101           | 41705998         | <i>Galt</i>             |
| ENSMUSG00000073888 <sup>a</sup> | 4   | 41716340           | 41721120         | <i>Ccl27a</i>           |
| ENSMUSG00000073884              | 4   | 41774204           | 41775337         | <i>Ccl21b</i>           |
| ENSMUSG00000096543              | 4   | 41870187           | 41870612         | <i>Gm21966</i>          |
| ENSMUSG00000094065              | 4   | 41903610           | 41904743         | <i>Gm21541</i>          |
| ENSMUSG00000078747              | 4   | 41941572           | 41943124         | <i>Gm20878</i>          |
| ENSMUSG00000078746              | 4   | 41966058           | 41971856         | <i>Gm20938</i>          |
| ENSMUSG00000096256              | 4   | 42033017           | 42034726         | <i>Gm21093</i>          |
| ENSMUSG00000095611              | 4   | 42035113           | 42035538         | <i>Gm10597</i>          |
| ENSMUSG00000095881              | 4   | 42083899           | 42084291         | <i>Gm21968</i>          |
| ENSMUSG00000094293              | 4   | 42091207           | 42092287         | <i>Gm3893</i>           |
| ENSMUSG00000073878              | 4   | 42114817           | 42115917         | <i>Gm13304</i>          |
| ENSMUSG00000073877 <sup>a</sup> | 4   | 42153436           | 42158839         | <i>Gm13306</i>          |

<sup>a</sup>indicates genes that are testis-specific.

Table S13. cont'd.

| Ensembl Gene ID                 | Chr | Gene Start<br>(bp) | Gene End<br>(bp) | Associated Gene<br>Name |
|---------------------------------|-----|--------------------|------------------|-------------------------|
| ENSMUSG00000073876              | 4   | 42158842           | 42168603         | <i>Gm13305</i>          |
| ENSMUSG00000096609              | 4   | 42170845           | 42171335         | <i>1700045111Rik</i>    |
| ENSMUSG00000094984              | 4   | 42219428           | 42219853         | <i>Gm10595</i>          |
| ENSMUSG00000083929              | 4   | 42240639           | 42242685         | <i>Gm10600</i>          |
| ENSMUSG00000095675              | 4   | 42255767           | 42256432         | <i>Ccl21b</i>           |
| ENSMUSG00000094695              | 4   | 42294267           | 42294855         | <i>Gm21953</i>          |
| ENSMUSG00000093996              | 4   | 42318334           | 42323929         | <i>Gm21598</i>          |
| ENSMUSG00000095234              | 4   | 42439378           | 42439966         | <i>Gm21586</i>          |
| ENSMUSG00000096892              | 4   | 42458751           | 42459176         | <i>Gm10597</i>          |
| ENSMUSG00000093909              | 4   | 42459563           | 42461272         | <i>Gm3883</i>           |
| ENSMUSG00000095779              | 4   | 42466752           | 42589938         | <i>Gm2163</i>           |
| ENSMUSG00000094066              | 4   | 42522580           | 42528175         | <i>Gm13298</i>          |
| ENSMUSG00000096260              | 4   | 42581229           | 42581621         | <i>Gm10592</i>          |
| ENSMUSG00000096596              | 4   | 42612195           | 42612860         | <i>Gm10591</i>          |
| ENSMUSG00000091938              | 4   | 42629719           | 42631714         | <i>Gm2564</i>           |
| ENSMUSG00000096826 <sup>a</sup> | 4   | 42655251           | 42656005         | <i>Ccl27b</i>           |
| ENSMUSG00000078735              | 4   | 42656355           | 42661893         | <i>Il11ra2</i>          |
| ENSMUSG00000094731              | 4   | 42668043           | 42668438         | <i>Gm9969</i>           |
| ENSMUSG00000095375              | 4   | 42714926           | 42719893         | <i>Gm21955</i>          |
| ENSMUSG00000054885              | 4   | 42735545           | 42846248         | <i>4930578G10Rik</i>    |
| ENSMUSG00000071005              | 4   | 42754525           | 42756577         | <i>Ccl19</i>            |
| ENSMUSG00000094686              | 4   | 42772860           | 42773993         | <i>Ccl21a</i>           |
| ENSMUSG00000078722              | 4   | 42781928           | 42856771         | <i>Gm12394</i>          |
| ENSMUSG00000078721              | 4   | 42848071           | 42853888         | <i>Gm12429</i>          |
| ENSMUSG00000050141 <sup>a</sup> | 4   | 42868004           | 42874234         | <i>BC049635</i>         |
| ENSMUSG00000036062              | 4   | 42916660           | 42944752         | <i>N28178</i>           |
| ENSMUSG00000028551              | 4   | 109660876          | 109667189        | <i>Cdkn2c</i>           |
| ENSMUSG00000010517 <sup>a</sup> | 4   | 109676588          | 109963960        | <i>Faf1</i>             |
| ENSMUSG00000029722              | 5   | 137650483          | 137684726        | <i>Agfg2</i>            |
| ENSMUSG00000045348              | 5   | 137730883          | 137741607        | <i>Nyap1</i>            |
| ENSMUSG00000029723 <sup>a</sup> | 5   | 137745730          | 137768450        | <i>Tsc22d4</i>          |
| ENSMUSG00000029659              | 5   | 149411749          | 149431723        | <i>Medag</i>            |
| ENSMUSG00000029660 <sup>a</sup> | 5   | 149439706          | 149470620        | <i>Tex26</i>            |
| ENSMUSG00000029658              | 5   | 149528679          | 149611894        | <i>Wdr95</i>            |
| ENSMUSG00000033174              | 6   | 88724412           | 88828360         | <i>Mgll</i>             |
| ENSMUSG00000030083              | 6   | 88835915           | 88841935         | <i>Abtb1</i>            |
| ENSMUSG00000033152              | 6   | 88842558           | 88875044         | <i>Podxl2</i>           |
| ENSMUSG00000030314              | 6   | 114643097          | 114860614        | <i>Atg7</i>             |
| ENSMUSG00000030315              | 6   | 114860628          | 114969994        | <i>Vgll4</i>            |
| ENSMUSG00000030316              | 6   | 115004381          | 115037876        | <i>Tamm41</i>           |
| ENSMUSG00000009394              | 6   | 115134902          | 115282626        | <i>Syn2</i>             |
| ENSMUSG00000092004              | 6   | 115227343          | 115259294        | <i>Gm17482</i>          |
| ENSMUSG00000030317              | 6   | 115245616          | 115251849        | <i>Timp4</i>            |
| ENSMUSG00000000440              | 6   | 115361221          | 115490401        | <i>Pparg</i>            |
| ENSMUSG00000042389              | 6   | 115544664          | 115578350        | <i>Tsen2</i>            |
| ENSMUSG00000068011              | 6   | 115583544          | 115592576        | <i>2510049J12Rik</i>    |
| ENSMUSG00000000439              | 6   | 115601938          | 115618670        | <i>Mkrr2</i>            |
| ENSMUSG00000000441              | 6   | 115618067          | 115676635        | <i>Raf1</i>             |
| ENSMUSG00000055396              | 6   | 115675995          | 115677136        | <i>D830050J10Rik</i>    |
| ENSMUSG00000059900              | 6   | 115729131          | 115762466        | <i>Tmem40</i>           |
| ENSMUSG00000030319              | 6   | 115774538          | 115804893        | <i>Cand2</i>            |
| ENSMUSG00000071226              | 6   | 120666369          | 120771190        | <i>Cecr2</i>            |
| ENSMUSG00000004902              | 6   | 120773768          | 120793982        | <i>Slc25a18</i>         |
| ENSMUSG00000019210              | 6   | 120795245          | 120822685        | <i>Atp6v1e1</i>         |

<sup>a</sup>indicates genes that are testis-specific.

Table S13. cont'd.

| Ensembl Gene ID                  | Chr | Gene Start<br>(bp) | Gene End<br>(bp) | Associated Gene<br>Name |
|----------------------------------|-----|--------------------|------------------|-------------------------|
| ENSMUSG00000009112               | 6   | 120836230          | 120892842        | <i>Bcl2l13</i>          |
| ENSMUSG00000004446               | 6   | 120891930          | 120916853        | <i>Bid</i>              |
| ENSMUSG000000051586              | 6   | 120931707          | 121003153        | <i>Mical3</i>           |
| ENSMUSG00000003178               | 6   | 121007241          | 121081609        | <i>Mical3</i>           |
| ENSMUSG000000030143              | 6   | 132361041          | 132364134        | <i>Gm8882</i>           |
| ENSMUSG000000059934              | 6   | 132569809          | 132572941        | <i>Prh1</i>             |
| ENSMUSG000000058295              | 6   | 132595913          | 132601236        | <i>Prp2</i>             |
| ENSMUSG000000067541              | 6   | 132625111          | 132627511        | <i>A630073D07Rik</i>    |
| ENSMUSG000000059382              | 6   | 132656957          | 132657844        | <i>Tas2r120</i>         |
| ENSMUSG000000071150              | 6   | 132700090          | 132701007        | <i>Tas2r121</i>         |
| ENSMUSG000000078280              | 6   | 132710999          | 132711928        | <i>Tas2r122</i>         |
| ENSMUSG000000071149              | 6   | 132737010          | 132738035        | <i>Tas2r115</i>         |
| ENSMUSG000000060412              | 6   | 132754730          | 132755659        | <i>Tas2r124</i>         |
| ENSMUSG000000056901              | 6   | 132762131          | 132763174        | <i>Tas2r102</i>         |
| ENSMUSG000000053217              | 6   | 132777179          | 132778162        | <i>Tas2r136</i>         |
| ENSMUSG000000058349              | 6   | 132802818          | 132803975        | <i>Tas2r117</i>         |
| ENSMUSG000000057381              | 6   | 132847142          | 132848143        | <i>Tas2r123</i>         |
| ENSMUSG000000030194              | 6   | 132855438          | 132856355        | <i>Tas2r116</i>         |
| ENSMUSG000000062952              | 6   | 132868008          | 132869009        | <i>Tas2r110</i>         |
| ENSMUSG000000056926              | 6   | 132893011          | 132893940        | <i>Tas2r113</i>         |
| ENSMUSG000000059410              | 6   | 132909651          | 132910587        | <i>Tas2r125</i>         |
| ENSMUSG000000063762              | 6   | 132951102          | 132952064        | <i>Tas2r129</i>         |
| ENSMUSG000000057699              | 6   | 132956884          | 132957919        | <i>Tas2r131</i>         |
| ENSMUSG000000062528              | 6   | 132980015          | 132980965        | <i>Tas2r109</i>         |
| ENSMUSG000000030196              | 6   | 133036163          | 133037101        | <i>Tas2r103</i>         |
| ENSMUSG000000071147              | 6   | 133054817          | 133055816        | <i>Tas2r140</i>         |
| ENSMUSG000000072704              | 6   | 133105239          | 133107747        | <i>2700089E24Rik</i>    |
| ENSMUSG000000055594              | 6   | 133292216          | 133295790        | <i>5530400C23Rik</i>    |
| ENSMUSG000000095412              | 6   | 133529189          | 133532762        | <i>Gm5885</i>           |
| ENSMUSG000000032758              | 6   | 133849855          | 133853667        | <i>Kap</i>              |
| ENSMUSG000000030199              | 6   | 134035700          | 134270158        | <i>Etv6</i>             |
| ENSMUSG000000030200              | 6   | 134396318          | 134438736        | <i>Bcl2l14</i>          |
| ENSMUSG000000035919 <sup>a</sup> | 9   | 22475715           | 22888280         | <i>Bbs9</i>             |
| ENSMUSG000000020052              | 10  | 87490819           | 87493660         | <i>Ascl1</i>            |
| ENSMUSG000000020051              | 10  | 87521795           | 87584136         | <i>Pah</i>              |
| ENSMUSG000000020053              | 10  | 87858265           | 87937042         | <i>Igf1</i>             |
| ENSMUSG000000035383              | 10  | 88091072           | 88092375         | <i>Pmch</i>             |
| ENSMUSG000000035365 <sup>a</sup> | 10  | 88091432           | 88146941         | <i>Parppb</i>           |
| ENSMUSG000000035351 <sup>a</sup> | 10  | 88146992           | 88178388         | <i>Nup37</i>            |
| ENSMUSG000000020056 <sup>a</sup> | 10  | 88201093           | 88246158         | <i>Ccdc53</i>           |
| ENSMUSG000000020057              | 10  | 88322804           | 88379080         | <i>Dram1</i>            |
| ENSMUSG000000035311              | 10  | 88379132           | 88447329         | <i>Gnptab</i>           |
| ENSMUSG000000060002              | 10  | 88452745           | 88504073         | <i>Chpt1</i>            |
| ENSMUSG000000020059 <sup>a</sup> | 10  | 88459569           | 88473236         | <i>Sycp3</i>            |
| ENSMUSG000000020061              | 10  | 88518279           | 88605152         | <i>Mybpc1</i>           |
| ENSMUSG00000004359               | 10  | 88674772           | 88685015         | <i>Spic</i>             |
| ENSMUSG000000060904              | 10  | 88730858           | 88744094         | <i>Arl1</i>             |
| ENSMUSG00000004356               | 10  | 88746607           | 88826814         | <i>Utp20</i>            |
| ENSMUSG000000020062              | 10  | 88885992           | 88929505         | <i>Slc5a8</i>           |
| ENSMUSG000000035189              | 10  | 88948994           | 89344762         | <i>Ano4</i>             |
| ENSMUSG000000074802              | 10  | 89408823           | 89443967         | <i>Gas2l3</i>           |
| ENSMUSG000000047638              | 10  | 89454234           | 89533585         | <i>Nr1h4</i>            |
| ENSMUSG000000019935              | 10  | 89574020           | 89621253         | <i>Slc17a8</i>          |
| ENSMUSG000000019906 <sup>a</sup> | 10  | 107271843          | 107425143        | <i>Lin7a</i>            |

<sup>a</sup>indicates genes that are testis-specific.

Table S13. cont'd.

| Ensembl Gene ID     | Chr | Gene Start<br>(bp) | Gene End<br>(bp) | Associated Gene<br>Name |
|---------------------|-----|--------------------|------------------|-------------------------|
| ENSMUSG00000000435  | 10  | 107482908          | 107486134        | <i>Myf5</i>             |
| ENSMUSG000000035923 | 10  | 107492860          | 107494729        | <i>Myf6</i>             |
| ENSMUSG000000035916 | 10  | 107517360          | 107720027        | <i>Ptprq</i>            |
| ENSMUSG000000091455 | 10  | 107762223          | 107912134        | <i>Otogl</i>            |
| ENSMUSG000000019907 | 10  | 108162400          | 108277575        | <i>Ppp1r12a</i>         |
| ENSMUSG000000035873 | 10  | 108332189          | 108414391        | <i>Pawr</i>             |
| ENSMUSG000000035864 | 10  | 108497650          | 109010982        | <i>Syt1</i>             |
| ENSMUSG000000020181 | 10  | 109682660          | 110000219        | <i>Nav3</i>             |

<sup>a</sup>indicates genes that are testis-specific.

**Table S14 Genes identified in regions of overlap between the results of QTL mapping, a study of the hybrid zone, and our study in comparisons between *M. m. musculus* and *M. m. domesticus*.**

| Ensembl Gene ID                 | Chr | Gene Start<br>(bp) | Gene End<br>(bp) | Associated Gene Name |
|---------------------------------|-----|--------------------|------------------|----------------------|
| ENSMUSG00000040152              | 2   | 118111876          | 118127133        | <i>Thbs1</i>         |
| ENSMUSG00000027344 <sup>a</sup> | 2   | 118204888          | 118256966        | <i>Fsip1</i>         |
| ENSMUSG00000040133              | 2   | 118277110          | 118373419        | <i>Gpr176</i>        |
| ENSMUSG00000005102              | 2   | 118388618          | 118475234        | <i>Eif2ak4</i>       |
| ENSMUSG00000009549 <sup>a</sup> | 2   | 118475850          | 118479711        | <i>Srp14</i>         |
| ENSMUSG00000040093              | 2   | 118528757          | 118549687        | <i>Bmf</i>           |
| ENSMUSG00000040084              | 2   | 118598211          | 118641591        | <i>Bub1b</i>         |
| ENSMUSG00000074923              | 2   | 118663303          | 118698020        | <i>Pak6</i>          |
| ENSMUSG00000078137              | 2   | 118699103          | 118703963        | <i>Ankrd63</i>       |
| ENSMUSG00000040061              | 2   | 118707517          | 118728438        | <i>Plcb2</i>         |
| ENSMUSG00000045838              | 2   | 118754158          | 118762661        | <i>A430105I19Rik</i> |
| ENSMUSG00000046804              | 2   | 118772769          | 118778165        | <i>Phgr1</i>         |
| ENSMUSG00000040035              | 2   | 118779719          | 118811293        | <i>Disp2</i>         |
| ENSMUSG00000027331              | 2   | 118814003          | 118853957        | <i>Knstrn</i>        |
| ENSMUSG00000027332              | 2   | 118861954          | 118882909        | <i>Ivd</i>           |
| ENSMUSG00000040007              | 2   | 118900377          | 118924528        | <i>Bahd1</i>         |
| ENSMUSG00000074916              | 2   | 118926497          | 118928585        | <i>Chst14</i>        |
| ENSMUSG00000039983              | 2   | 119017779          | 119029393        | <i>Ccdc32</i>        |
| ENSMUSG00000027324              | 2   | 119034790          | 119039769        | <i>Rpusd2</i>        |
| ENSMUSG00000027326 <sup>a</sup> | 2   | 119047119          | 119105501        | <i>Casc5</i>         |
| ENSMUSG00000027323 <sup>a</sup> | 2   | 119112793          | 119147445        | <i>Rad51</i>         |
| ENSMUSG00000070730              | 2   | 119137001          | 119157034        | <i>Rmdn3</i>         |
| ENSMUSG00000046814              | 2   | 119167773          | 119172390        | <i>Gchfr</i>         |
| ENSMUSG00000034278              | 2   | 119172500          | 119208795        | <i>Dnajc17</i>       |
| ENSMUSG00000055926              | 2   | 119174509          | 119177575        | <i>Gm14137</i>       |
| ENSMUSG00000068580 <sup>a</sup> | 2   | 119208617          | 119217049        | <i>Zfyve19</i>       |
| ENSMUSG00000027317              | 2   | 119218119          | 119229906        | <i>Ppp1r14d</i>      |
| ENSMUSG00000027315              | 2   | 119237362          | 119249527        | <i>Spint1</i>        |
| ENSMUSG00000034226 <sup>a</sup> | 2   | 119269201          | 119271272        | <i>Rhov</i>          |
| ENSMUSG00000034216              | 2   | 119288740          | 119298453        | <i>Vps18</i>         |
| ENSMUSG00000027314              | 2   | 119325784          | 119335962        | <i>Dll4</i>          |
| ENSMUSG00000027313              | 2   | 119351229          | 119354381        | <i>Chac1</i>         |
| ENSMUSG00000034154              | 2   | 119373042          | 119477687        | <i>Ino80</i>         |
| ENSMUSG00000048647              | 2   | 119516505          | 119547627        | <i>Exd1</i>          |
| ENSMUSG00000014077              | 2   | 119547697          | 119587027        | <i>Chp1</i>          |
| ENSMUSG00000072980              | 2   | 119609512          | 119618469        | <i>Oip5</i>          |
| ENSMUSG00000027306              | 2   | 119618298          | 119651244        | <i>Nusap1</i>        |
| ENSMUSG00000027305              | 2   | 119655446          | 119662827        | <i>Ndufaf1</i>       |
| ENSMUSG00000027304              | 2   | 119675068          | 119735407        | <i>Rtf1</i>          |
| ENSMUSG00000027296              | 2   | 119742337          | 119751263        | <i>Itpka</i>         |
| ENSMUSG00000027297              | 2   | 119751320          | 119760431        | <i>Ltk</i>           |
| ENSMUSG00000034032              | 2   | 119763304          | 119787537        | <i>Rpap1</i>         |
| ENSMUSG00000027298              | 2   | 119797733          | 119818104        | <i>Tyro3</i>         |
| ENSMUSG00000028524              | 4   | 102741297          | 102973628        | <i>Sgip1</i>         |
| ENSMUSG00000028523 <sup>a</sup> | 4   | 102986379          | 103005594        | <i>Tctex1d1</i>      |
| ENSMUSG00000066090              | 4   | 103017872          | 103026842        | <i>Insl5</i>         |
| ENSMUSG00000035126 <sup>a</sup> | 4   | 103038065          | 103114555        | <i>Wdr78</i>         |
| ENSMUSG00000028522 <sup>a</sup> | 4   | 103114390          | 103165754        | <i>Mier1</i>         |
| ENSMUSG00000028521              | 4   | 103170649          | 103215164        | <i>Slc35d1</i>       |

<sup>a</sup>indicates genes that are testis-specific.



Table S14. cont'd.

| Ensembl Gene ID                 | Chr | Gene Start (bp) | Gene End (bp) | Associated Gene Name |
|---------------------------------|-----|-----------------|---------------|----------------------|
| ENSMUSG00000028520 <sup>a</sup> | 4   | 103230445       | 103290863     | <i>4921539E11Rik</i> |
| ENSMUSG00000035069              | 4   | 103313812       | 103371868     | <i>Oma1</i>          |
| ENSMUSG00000028519              | 4   | 103619359       | 104744844     | <i>Dab1</i>          |
| ENSMUSG00000070886              | 4   | 104328252       | 104330557     | <i>Gm10304</i>       |
| ENSMUSG00000029656              | 4   | 104766317       | 104804548     | <i>C8b</i>           |
| ENSMUSG00000035031              | 4   | 104815679       | 104876398     | <i>C8a</i>           |
| ENSMUSG00000095386              | 4   | 104857329       | 104859137     | <i>Gm17662</i>       |
| ENSMUSG00000078612              | 4   | 104913456       | 105016863     | <i>1700024P16Rik</i> |
| ENSMUSG00000028518              | 4   | 105029874       | 105109890     | <i>Prkaa2</i>        |
| ENSMUSG00000028517              | 4   | 105157347       | 105232764     | <i>Ppap2b</i>        |
| ENSMUSG00000029705              | 5   | 136248135       | 136567490     | <i>Cux1</i>          |
| ENSMUSG00000046548              | 5   | 136613702       | 136615328     | <i>4731417B20Rik</i> |
| ENSMUSG00000005474 <sup>a</sup> | 5   | 136693146       | 136701094     | <i>Myl10</i>         |
| ENSMUSG00000004415              | 5   | 136741759       | 136883209     | <i>Col26a1</i>       |
| ENSMUSG00000007987 <sup>a</sup> | 5   | 136908150       | 136913244     | <i>Rab15</i>         |
| ENSMUSG00000019054              | 5   | 136953275       | 136966234     | <i>Fis1</i>          |
| ENSMUSG00000001739              | 5   | 136966616       | 136975858     | <i>Cldn15</i>        |
| ENSMUSG00000059518 <sup>a</sup> | 5   | 136982164       | 136988021     | <i>Znhit1</i>        |
| ENSMUSG00000004846              | 5   | 136987019       | 136996648     | <i>Plod3</i>         |
| ENSMUSG00000037428              | 5   | 137030295       | 137033351     | <i>Vgf</i>           |
| ENSMUSG00000004849              | 5   | 137034993       | 137046135     | <i>Ap1s1</i>         |
| ENSMUSG000000037411             | 5   | 137061504       | 137072272     | <i>Serpine1</i>      |
| ENSMUSG00000043279              | 5   | 137105644       | 137116209     | <i>Trim56</i>        |
| ENSMUSG00000037390 <sup>a</sup> | 5   | 137134924       | 137149320     | <i>Muc3</i>          |
| ENSMUSG00000079174              | 5   | 137154030       | 137166001     | <i>Gm3054</i>        |
| ENSMUSG00000094840              | 5   | 137208813       | 137212389     | <i>A630081J09Rik</i> |
| ENSMUSG00000023328              | 5   | 137287519       | 137294466     | <i>Ache</i>          |
| ENSMUSG00000051502              | 5   | 137294669       | 137295664     | <i>Ufsp1</i>         |
| ENSMUSG00000037364 <sup>a</sup> | 5   | 137295704       | 137307674     | <i>Srrt</i>          |
| ENSMUSG00000023348              | 5   | 137309899       | 137314241     | <i>Trip6</i>         |
| ENSMUSG00000037344              | 5   | 137314558       | 137333597     | <i>Slc12a9</i>       |
| ENSMUSG00000029710              | 5   | 137350109       | 137378669     | <i>Ephb4</i>         |
| ENSMUSG000000079173             | 5   | 137378637       | 137477064     | <i>Zan</i>           |
| ENSMUSG00000029711              | 5   | 137483020       | 137533242     | <i>Epo</i>           |
| ENSMUSG00000029715              | 5   | 137501438       | 137502518     | <i>Pop7</i>          |
| ENSMUSG00000029714              | 5   | 137518880       | 137527934     | <i>Gigyf1</i>        |
| ENSMUSG00000029713              | 5   | 137528127       | 137533510     | <i>Gnb2</i>          |
| ENSMUSG00000029712              | 5   | 137553517       | 137569582     | <i>Actl6b</i>        |
| ENSMUSG00000029716              | 5   | 137569851       | 137587481     | <i>Tfr2</i>          |
| ENSMUSG00000037221              | 5   | 137596645       | 137601058     | <i>Mospd3</i>        |
| ENSMUSG00000029718              | 5   | 137605103       | 137613784     | <i>Pcolce</i>        |
| ENSMUSG00000089984 <sup>a</sup> | 5   | 137612503       | 137629002     | <i>Fbxo24</i>        |
| ENSMUSG00000093445              | 5   | 137629121       | 137641099     | <i>Lrch4</i>         |
| ENSMUSG00000029720              | 5   | 137629175       | 137642899     | <i>Gm20605</i>       |
| ENSMUSG00000079165              | 5   | 137641334       | 137642902     | <i>Sap25</i>         |
| ENSMUSG00000047182              | 5   | 137643032       | 137645714     | <i>Irs3</i>          |
| ENSMUSG00000029722              | 5   | 137650483       | 137684726     | <i>Agfg2</i>         |
| ENSMUSG00000045348              | 5   | 137730883       | 137741607     | <i>Nyap1</i>         |
| ENSMUSG00000029723 <sup>a</sup> | 5   | 137745730       | 137768450     | <i>Tsc22d4</i>       |
| ENSMUSG00000029725 <sup>a</sup> | 5   | 137778849       | 137780110     | <i>Ppp1r35</i>       |
| ENSMUSG00000029726 <sup>a</sup> | 5   | 137781906       | 137786715     | <i>Mepce</i>         |
| ENSMUSG00000037108              | 5   | 137787798       | 137822621     | <i>Zcwpw1</i>        |
| ENSMUSG00000046245              | 5   | 137821952       | 137836268     | <i>Pilra</i>         |

<sup>a</sup>indicates genes that are testis-specific.

Table S14. cont'd.

| Ensembl Gene ID                 | Chr | Gene Start (bp) | Gene End (bp) | Associated Gene Name |
|---------------------------------|-----|-----------------|---------------|----------------------|
| ENSMUSG00000066684              | 5   | 137852147       | 137858049     | <i>Pilrb1</i>        |
| ENSMUSG00000066682              | 5   | 137865829       | 137871758     | <i>Pilrb2</i>        |
| ENSMUSG00000029727              | 5   | 137892932       | 137921619     | <i>Cyp3a13</i>       |
| ENSMUSG00000056966              | 5   | 137953809       | 137962959     | <i>Gjc3</i>          |
| ENSMUSG00000037053              | 5   | 137981521       | 137990233     | <i>Azgp1</i>         |
| ENSMUSG00000075599              | 5   | 138021276       | 138034665     | <i>Smok3a</i>        |
| ENSMUSG00000079156              | 5   | 138021429       | 138050636     | <i>Smok3b</i>        |
| ENSMUSG00000029729              | 5   | 138085084       | 138107822     | <i>Zkscan1</i>       |
| ENSMUSG00000037017 <sup>a</sup> | 5   | 138116903       | 138134265     | <i>Zscan21</i>       |
| ENSMUSG00000037007              | 5   | 138139702       | 138155744     | <i>Zfp113</i>        |
| ENSMUSG00000019494              | 5   | 138161071       | 138164646     | <i>Cops6</i>         |
| ENSMUSG00000029730 <sup>a</sup> | 5   | 138164583       | 138172422     | <i>Mcm7</i>          |
| ENSMUSG00000019518              | 5   | 138172002       | 138178708     | <i>Ap4m1</i>         |
| ENSMUSG00000036980 <sup>a</sup> | 5   | 138178617       | 138187451     | <i>Taf6</i>          |
| ENSMUSG00000036968              | 5   | 138187485       | 138193918     | <i>Cnpy4</i>         |
| ENSMUSG00000049285              | 5   | 138194314       | 138195621     | <i>Mblac1</i>        |
| ENSMUSG00000089783              | 5   | 138203609       | 138207308     | <i>Gm454</i>         |
| ENSMUSG00000047592              | 5   | 138225898       | 138253363     | <i>Nxpe5</i>         |
| ENSMUSG00000050552              | 5   | 138255608       | 138259398     | <i>Lamtor4</i>       |
| ENSMUSG000000036948             | 5   | 138259656       | 138264046     | <i>BC037034</i>      |
| ENSMUSG000000091964             | 5   | 138259658       | 138264046     | <i>BC037034</i>      |
| ENSMUSG00000075593              | 5   | 138264921       | 138272840     | <i>Gal3st4</i>       |
| ENSMUSG00000029510              | 5   | 138264952       | 138280005     | <i>Gpc2</i>          |
| ENSMUSG00000036928 <sup>a</sup> | 5   | 138280240       | 138312393     | <i>Stag3</i>         |
| ENSMUSG00000075591              | 5   | 138363719       | 138388287     | <i>Gm10874</i>       |
| ENSMUSG00000036898              | 5   | 138441468       | 138460694     | <i>Zfp157</i>        |
| ENSMUSG00000029526              | 5   | 138561840       | 138564694     | <i>1700123K08Rik</i> |
| ENSMUSG00000058291              | 5   | 138604616       | 138619761     | <i>Zfp68</i>         |
| ENSMUSG00000056014              | 5   | 138622859       | 138648903     | <i>A430033K04Rik</i> |
| ENSMUSG00000025854              | 5   | 138754514       | 138810077     | <i>Fam20c</i>        |
| ENSMUSG000000094504             | 5   | 138820080       | 138821619     | <i>Gm5294</i>        |
| ENSMUSG00000025856              | 5   | 138976014       | 138997370     | <i>Pdgfa</i>         |
| ENSMUSG00000075585              | 5   | 138995056       | 139000576     | <i>6330403L08Rik</i> |
| ENSMUSG00000025855              | 5   | 139017306       | 139150001     | <i>Prkar1b</i>       |
| ENSMUSG00000025857              | 5   | 139150223       | 139186510     | <i>Heatr2</i>        |
| ENSMUSG00000036817              | 5   | 139200637       | 139249840     | <i>Sun1</i>          |
| ENSMUSG00000025858              | 5   | 139252324       | 139270051     | <i>Get4</i>          |
| ENSMUSG00000056413              | 5   | 139271876       | 139325622     | <i>Adap1</i>         |
| ENSMUSG00000045438              | 5   | 139336189       | 139345233     | <i>Cox19</i>         |
| ENSMUSG00000029541              | 5   | 139352617       | 139357033     | <i>Cyp2w1</i>        |
| ENSMUSG00000053553              | 5   | 139359739       | 139460502     | <i>3110082117Rik</i> |
| ENSMUSG00000044197              | 5   | 139377742       | 139396415     | <i>Gpr146</i>        |
| ENSMUSG000000021206             | 5   | 139378220       | 139379259     | <i>D830046C22Rik</i> |
| ENSMUSG00000044092              | 5   | 139405280       | 139415623     | <i>C130050O18Rik</i> |
| ENSMUSG00000053647              | 5   | 139423151       | 139427800     | <i>Gper1</i>         |
| ENSMUSG00000053581              | 5   | 139471211       | 139484549     | <i>Zfand2a</i>       |
| ENSMUSG00000029546              | 5   | 139543494       | 139548179     | <i>Uncx</i>          |
| ENSMUSG00000036718              | 5   | 139706693       | 139736336     | <i>Micall2</i>       |
| ENSMUSG00000029547              | 5   | 139751282       | 139775678     | <i>Ints1</i>         |
| ENSMUSG00000018143              | 5   | 139791513       | 139802653     | <i>Mafk</i>          |
| ENSMUSG00000036687 <sup>a</sup> | 5   | 139802485       | 139819917     | <i>Tmem184a</i>      |
| ENSMUSG00000098140              | 5   | 139807978       | 139826407     | <i>Gm26938</i>       |
| ENSMUSG00000029551              | 5   | 139823592       | 139826885     | <i>Psmg3</i>         |

<sup>a</sup>indicates genes that are testis-specific.

Table S14. cont'd.

| Ensembl Gene ID                  | Chr | Gene Start (bp) | Gene End (bp) | Associated Gene Name |
|----------------------------------|-----|-----------------|---------------|----------------------|
| ENSMUSG00000048988               | 5   | 139907943       | 139974711     | <i>Elfn1</i>         |
| ENSMUSG000000031737              | 8   | 92357796        | 92361456      | <i>Irx5</i>          |
| ENSMUSG000000031738              | 8   | 92674289        | 92680956      | <i>Irx6</i>          |
| ENSMUSG000000031740              | 8   | 92827328        | 92853417      | <i>Mmp2</i>          |
| ENSMUSG000000033192              | 8   | 92855350        | 92919279      | <i>Lpcat2</i>        |
| ENSMUSG000000078144              | 8   | 92901395        | 92902409      | <i>Capns2</i>        |
| ENSMUSG000000055368              | 8   | 92960079        | 93001667      | <i>Slc6a2</i>        |
| ENSMUSG000000071047              | 8   | 93020214        | 93048192      | <i>Ces1a</i>         |
| ENSMUSG000000078964              | 8   | 93056727        | 93080017      | <i>Ces1b</i>         |
| ENSMUSG000000057400              | 8   | 93099015        | 93131283      | <i>Ces1c</i>         |
| ENSMUSG000000056973              | 8   | 93166068        | 93197838      | <i>Ces1d</i>         |
| ENSMUSG000000061959              | 8   | 93201218        | 93229619      | <i>Ces1e</i>         |
| ENSMUSG000000031725              | 8   | 93256236        | 93279747      | <i>Ces1f</i>         |
| ENSMUSG000000057074              | 8   | 93302369        | 93337308      | <i>Ces1g</i>         |
| ENSMUSG000000074156              | 8   | 93351843        | 93363676      | <i>Ces1h</i>         |
| ENSMUSG000000058019              | 8   | 93499213        | 93535707      | <i>Ces5a</i>         |
| ENSMUSG000000031748              | 8   | 93809966        | 93969388      | <i>Gnao1</i>         |
| ENSMUSG000000031751              | 8   | 93971588        | 94012663      | <i>Amfr</i>          |
| ENSMUSG000000031754 <sup>a</sup> | 8   | 94017770        | 94037021      | <i>Nudt21</i>        |
| ENSMUSG000000033009              | 8   | 94037198        | 94067921      | <i>Ogfod1</i>        |
| ENSMUSG000000031755              | 8   | 94067954        | 94098811      | <i>Bbs2</i>          |
| ENSMUSG000000031757              | 8   | 94137204        | 94139031      | <i>Mt4</i>           |
| ENSMUSG000000031760              | 8   | 94152607        | 94154148      | <i>Mt3</i>           |
| ENSMUSG000000031762              | 8   | 94172618        | 94173567      | <i>Mt2</i>           |
| ENSMUSG000000031765              | 8   | 94179089        | 94180325      | <i>Mt1</i>           |
| ENSMUSG000000032939              | 8   | 94214597        | 94315066      | <i>Nup93</i>         |
| ENSMUSG000000031766              | 8   | 94329192        | 94366213      | <i>Slc12a3</i>       |
| ENSMUSG000000031770              | 8   | 94386438        | 94395377      | <i>Herpud1</i>       |
| ENSMUSG000000074151              | 8   | 94472763        | 94527272      | <i>Nlrc5</i>         |
| ENSMUSG000000034361              | 8   | 94532990        | 94570529      | <i>Cpne2</i>         |
| ENSMUSG000000031774              | 8   | 94574943        | 94601726      | <i>Fam192a</i>       |
| ENSMUSG000000050079 <sup>a</sup> | 8   | 94601955        | 94660275      | <i>Rspry1</i>        |
| ENSMUSG000000031776 <sup>a</sup> | 8   | 94666755        | 94674417      | <i>Arl2bp</i>        |
| ENSMUSG000000031775              | 8   | 94674895        | 94696242      | <i>Plip</i>          |
| ENSMUSG000000031779              | 8   | 94745590        | 94751699      | <i>Ccl22</i>         |
| ENSMUSG000000031778              | 8   | 94772009        | 94782423      | <i>Cx3cl1</i>        |
| ENSMUSG000000031780              | 8   | 94810453        | 94812035      | <i>Ccl17</i>         |
| ENSMUSG000000031781              | 8   | 94819818        | 94838358      | <i>Ciapin1</i>       |
| ENSMUSG000000031782              | 8   | 94838321        | 94854895      | <i>Coq9</i>          |
| ENSMUSG000000031783              | 8   | 94857450        | 94864242      | <i>Polr2c</i>        |
| ENSMUSG000000040631              | 8   | 94863828        | 94876312      | <i>Dok4</i>          |
| ENSMUSG000000063605              | 8   | 94902869        | 94918098      | <i>Ccdc102a</i>      |
| ENSMUSG000000061577              | 8   | 94923694        | 94943290      | <i>Gpr114</i>        |
| ENSMUSG000000031785              | 8   | 94977109        | 95014208      | <i>Gpr56</i>         |
| ENSMUSG000000022295              | 15  | 38661904        | 38692443      | <i>Atp6v1c1</i>      |
| ENSMUSG000000022296              | 15  | 38933142        | 38949405      | <i>Baalc</i>         |
| ENSMUSG000000022297              | 15  | 39006280        | 39038186      | <i>Fzd6</i>          |
| ENSMUSG000000054196              | 15  | 39076932        | 39087121      | <i>Cthrc1</i>        |
| ENSMUSG000000022299              | 15  | 39094191        | 39112716      | <i>Slc25a32</i>      |
| ENSMUSG000000022300              | 15  | 39112874        | 39146856      | <i>Dcaf13</i>        |
| ENSMUSG000000037386              | 15  | 39198332        | 39681940      | <i>Rims2</i>         |
| ENSMUSG000000022303              | 15  | 39745932        | 39760934      | <i>Dcstamp</i>       |
| ENSMUSG000000022304              | 15  | 39768485        | 39857470      | <i>Dpys</i>          |
| ENSMUSG000000022305              | 15  | 39870603        | 39943994      | <i>Lrp12</i>         |

<sup>a</sup>indicates genes that are testis-specific.

Table S14. cont'd.

| Ensembl Gene ID                 | Chr | Gene Start (bp) | Gene End (bp) | Associated Gene Name |
|---------------------------------|-----|-----------------|---------------|----------------------|
| ENSMUSG00000094112              | 15  | 40142188        | 40148689      | <i>9330182O14Rik</i> |
| ENSMUSG00000022306              | 15  | 40655042        | 41104592      | <i>Zfpm2</i>         |
| ENSMUSG00000022307              | 15  | 41447482        | 41861048      | <i>Oxr1</i>          |
| ENSMUSG00000042895              | 15  | 41865293        | 41869720      | <i>Abra</i>          |
| ENSMUSG00000022309              | 15  | 42424727        | 42676977      | <i>Angpt1</i>        |
| ENSMUSG00000051920              | 15  | 43020811        | 43170818      | <i>Rspo2</i>         |
| ENSMUSG00000022336              | 15  | 43250040        | 43282736      | <i>Eif3e</i>         |
| ENSMUSG00000072592              | 15  | 43430943        | 43477036      | <i>Gm10373</i>       |
| ENSMUSG00000022337              | 15  | 43477229        | 43527777      | <i>Emc2</i>          |
| ENSMUSG00000054409              | 15  | 43866695        | 43870029      | <i>Tmem74</i>        |
| ENSMUSG00000048915              | 17  | 62604184        | 62881317      | <i>Efna5</i>         |
| ENSMUSG00000090425              | 17  | 62604292        | 62606707      | <i>Efna5</i>         |
| ENSMUSG00000023965 <sup>a</sup> | 17  | 63057452        | 63500017      | <i>Fbxl17</i>        |
| ENSMUSG00000045506              | 17  | 63863300        | 63863791      | <i>A930002H24Rik</i> |
| ENSMUSG00000000127              | 17  | 63896018        | 64139494      | <i>Fer</i>           |
| ENSMUSG00000024083              | 17  | 64281005        | 64331916      | <i>Pja2</i>          |
| ENSMUSG00000073377              | 17  | 64514081        | 64555660      | <i>AU016765</i>      |
| ENSMUSG00000024085              | 17  | 64600736        | 64755110      | <i>Man2a1</i>        |
| ENSMUSG00000024088              | 17  | 64832523        | 64836071      | <i>4930583I09Rik</i> |
| ENSMUSG00000045036 <sup>a</sup> | 17  | 65256005        | 65540782      | <i>Tmem232</i>       |
| ENSMUSG00000024091              | 17  | 65580056        | 65613555      | <i>Vapa</i>          |
| ENSMUSG00000050612 <sup>a</sup> | 17  | 65637505        | 65642204      | <i>Txndc2</i>        |
| ENSMUSG00000056515              | 17  | 65651726        | 65772752      | <i>Rab31</i>         |
| ENSMUSG00000061950 <sup>a</sup> | 17  | 65782573        | 65841926      | <i>Ppp4r1</i>        |
| ENSMUSG00000024096              | 17  | 65848433        | 65885755      | <i>Ralbp1</i>        |
| ENSMUSG00000024098              | 17  | 65923066        | 65951187      | <i>Twsg1</i>         |
| ENSMUSG00000034647              | 17  | 65967501        | 66077089      | <i>Ankrd12</i>       |
| ENSMUSG00000024099 <sup>a</sup> | 17  | 66078795        | 66101559      | <i>Ndufv2</i>        |
| ENSMUSG00000024101              | 17  | 66111546        | 66120503      | <i>Wash</i>          |
| ENSMUSG00000035842 <sup>a</sup> | 17  | 66123520        | 66152167      | <i>Ddx11</i>         |
| ENSMUSG00000052105              | 17  | 66336982        | 66449750      | <i>Soga2</i>         |
| ENSMUSG00000023460              | 17  | 66494512        | 66519717      | <i>Rab12</i>         |
| ENSMUSG00000024105              | 17  | 66555252        | 66594621      | <i>Themis3</i>       |

<sup>a</sup>indicates genes that are testis-specific.
