# Supplementary material
Source: PubMed Central journal article supplement (PMC4174939)
Supplement: supp_114.166827_FigureS1.pdf [file supp_114.166827_FigureS1.pdf]

# A

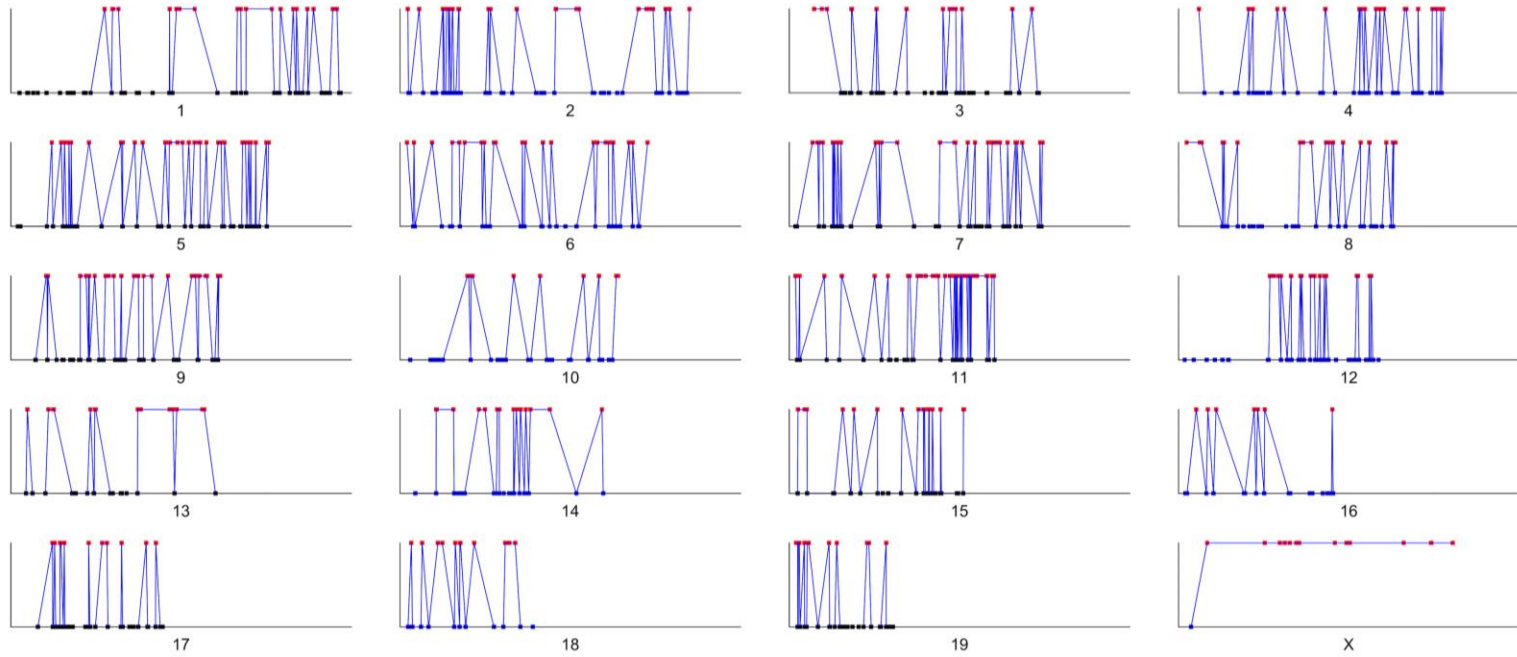

# B

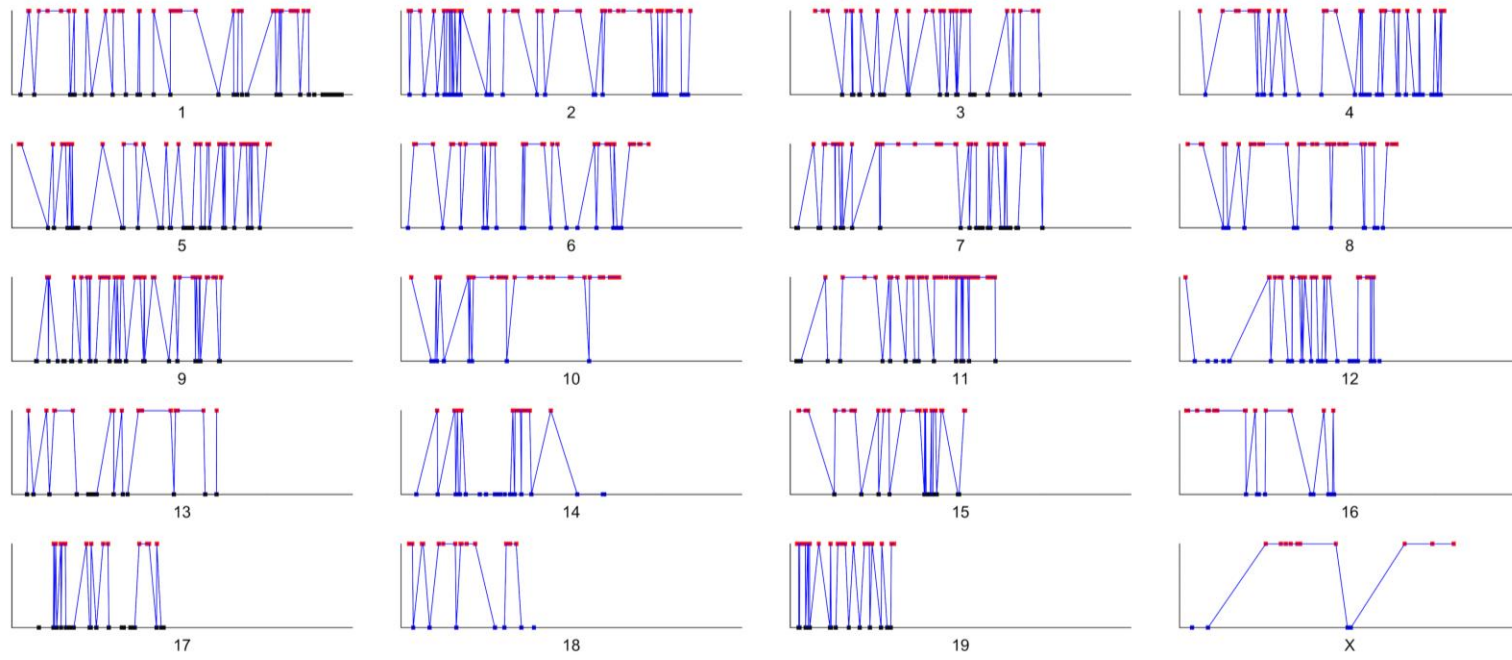

**C**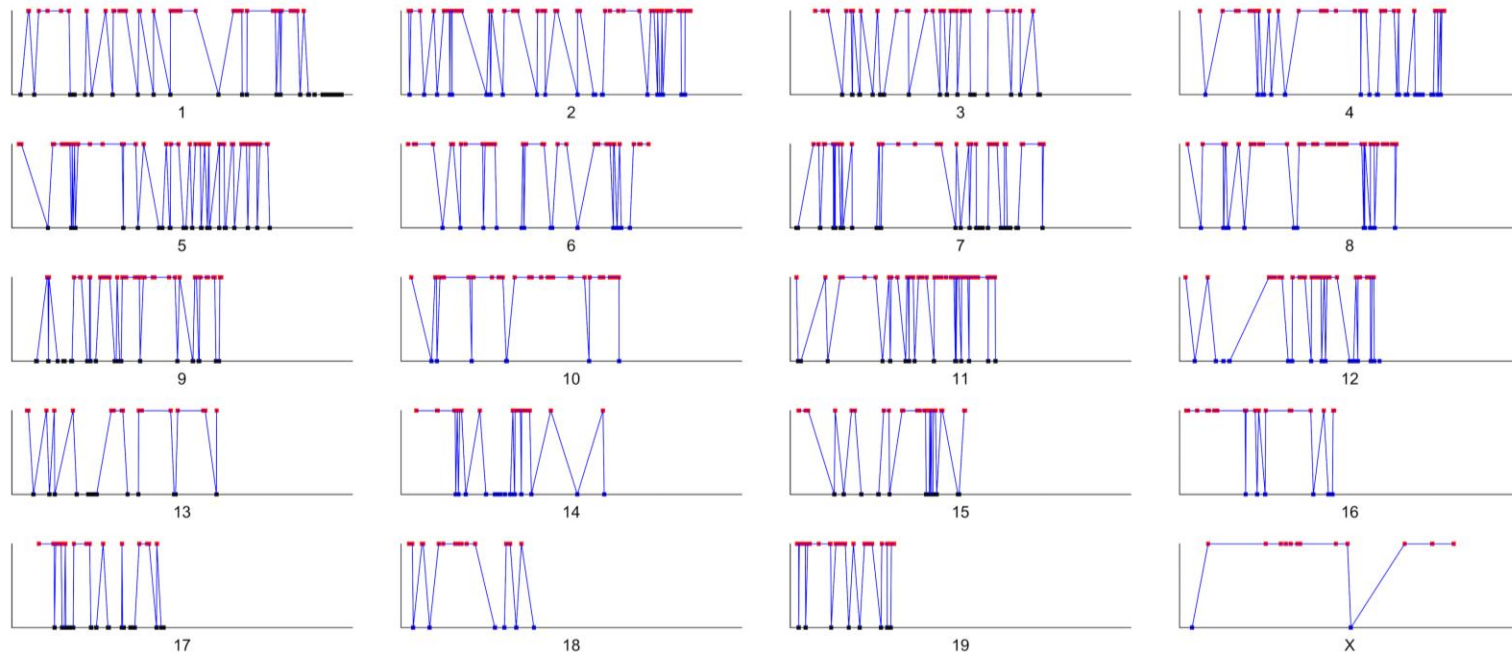

**Figure S1** Fixed differences and shared polymorphisms across the genome for all pairwise comparisons of subspecies of *Mus*. Fixed differences are shown as red dots above the axis while shared polymorphisms are shown as dots on the x axis. (A) *M. m. castaneus* and *M. m. domesticus*. (B) *M. m. castaneus* and *M. m. musculus*. (C) *M. m. domesticus* and *M. m. musculus*.
