# Supplementary material
Source: PubMed Central journal article supplement (PMC4174939)
Supplement: supp_114.166827_FigureS5.pdf [file supp_114.166827_FigureS5.pdf]

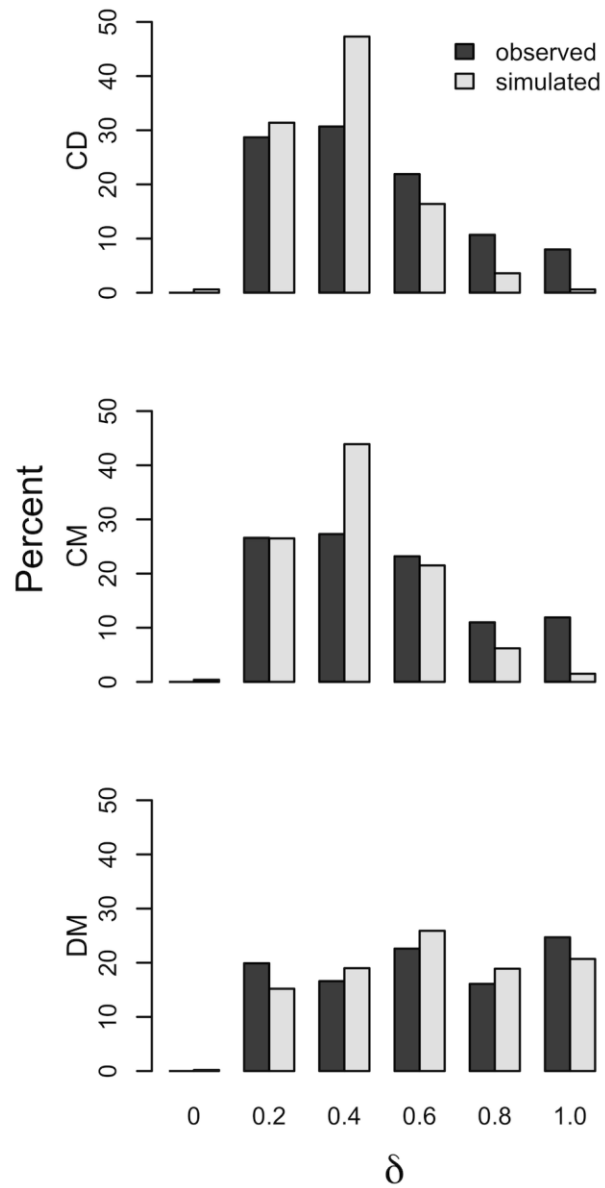

**Figure S5** The distribution of values of  $\delta$  in the observed data and in simulations based on demographic parameters from Supporting Information Table 7, but with a divergence time of 425 Kya.
