# Supplementary material
Source: PubMed Central journal article supplement (PMC4174939)
Supplement: supp_114.166827_TableS1.pdf [file supp_114.166827_TableS1.pdf]

**Table S1 Sampling localities for all wild-derived inbred laboratory strains used in this study.**

| Subspecies              | Wild Derived Inbred    |                |                 |
|-------------------------|------------------------|----------------|-----------------|
|                         | Line ID                | Country        | Locality        |
| <i>M. m. castaneus</i>  | CAST/EIJ <sup>a</sup>  | Thailand       | Thonburi        |
|                         | CIM/MPL                | India          | Masinagudi      |
|                         | CKN/MPL                | Kenya          | Nairobi         |
|                         | CKS/MPL                | Kenya          | Shanzu          |
|                         | CTP/MPL <sup>b</sup>   | Thailand       | Pathumthani     |
|                         | DKN/MPL                | Kenya          | Nairobi         |
|                         | MDG/MPL                | Madagascar     | Manakasina      |
|                         | MPR/MPL <sup>b</sup>   | Pakistan       | Rawalpindi      |
| <i>M. m. domesticus</i> | BIK/MPL                | Israel         | Kefar Galim     |
|                         | BZO/MPL                | Algeria        | Oran            |
|                         | DCP/MPL                | Cyprus         | Paphos          |
|                         | DJO/MPL                | Italy          | Orcetto         |
|                         | DMZ/MPL                | Morocco        | Azemmour        |
|                         | LEWES/EIJ              | USA            | Delaware        |
|                         | WLA/MPL                | France         | Toulouse        |
|                         | WSB/EIJ <sup>a</sup>   | USA            | Maryland        |
| <i>M. m. musculus</i>   | BID/MPL <sup>b</sup>   | Iran           | Birdjand        |
|                         | CZECHII/EIJ            | Czechoslovakia |                 |
|                         | MBK/MPL                | Bulgaria       | Kranevo         |
|                         | MBT/MPL                | Bulgaria       | Général Toshevo |
|                         | MCZ/MPL                | Czech Republic | Bialowieza      |
|                         | MDH/MPL                | Denmark        | Hov             |
|                         | MPB/MPL                | Poland         | Prague          |
|                         | PWK/PhJ <sup>c</sup>   | Czech Republic | Lhotka          |
| <i>M. caroli</i>        | CAROLI/EIJ             | Thailand       |                 |
| <i>M. spretus</i>       | SPRET/EIJ <sup>c</sup> | Spain          | Cadiz           |

<sup>a</sup>Data were taken from the Wellcome Trust Mouse Genomes Project.

<sup>b</sup>Data were excluded from further analyses due to admixture.

<sup>c</sup>Data from transcriptome sequencing was combined with data from the Wellcome Trust Mouse Genomes Project.
