# Supplementary material
Source: PubMed Central journal article supplement (PMC4174939)
Supplement: supp_114.166827_TableS2.pdf [file supp_114.166827_TableS2.pdf]

**Table S2 Short read transcriptome sequencing yields in megabases for all wild-derived inbred lines included in the study.**

| Subspecies              | Line        | Sequenced | Mapped | Mapped Uniquely | 6X high quality sequence |
|-------------------------|-------------|-----------|--------|-----------------|--------------------------|
| <i>M. m. castaneus</i>  | CIM         | 1,330.84  | 712    | 377             | 16.63                    |
|                         | CKN         | 1,122.00  | 631    | 324             | 14.13                    |
|                         | CKS         | 869.97    | 453    | 273             | 12.01                    |
|                         | CTP         | 968.65    | 533    | 302             | 13.76                    |
|                         | DKN         | 1,189.87  | 671    | 341             | 14.85                    |
|                         | MDG         | 1,113.24  | 596    | 319             | 14.03                    |
|                         | MPR         | 1,190.66  | 621    | 334             | 15.41                    |
| <i>M. m. domesticus</i> | BIK/MPL     | 998.97    | 543    | 296             | 13.42                    |
|                         | BZO/MPL     | 1,014.07  | 588    | 333             | 15.02                    |
|                         | DCP/MPL     | 1,489.47  | 799    | 380             | 16.55                    |
|                         | DJO/MPL     | 1,169.41  | 631    | 324             | 14.39                    |
|                         | DMZ/MPL     | 1,397.35  | 776    | 376             | 16.85                    |
|                         | LEWES/EIJ   | 3,640.53  | 1,585  | 573             | 22.69                    |
|                         | WLA/MPL     | 1,241.30  | 652    | 324             | 14.25                    |
| <i>M. m. musculus</i>   | BID/MPL     | 863.31    | 486    | 288             | 13.3                     |
|                         | CZECHII/EIJ | 1,237.15  | 716    | 375             | 16.93                    |
|                         | MBK/MPL     | 1,005.21  | 546    | 295             | 13.01                    |
|                         | MBT/MPL     | 1,651.32  | 931    | 444             | 19.16                    |
|                         | MCZ/MPL     | 1,574.79  | 977    | 474             | 19.86                    |
|                         | MDH/MPL     | 1,127.44  | 663    | 355             | 15.53                    |
|                         | MPB/MPL     | 801.8     | 488    | 287             | 12.85                    |
| <i>M. caroli</i>        | PWK/PhJ     | 1,675.66  | 1,048  | 496             | 21.25                    |
|                         | CAROLI/EIJ  | 3,063.49  | 1,442  | 596             | 21.68                    |
| <i>M. spretus</i>       | SPRET/EIJ   | 1,921.25  | 1,092  | 513             | 21.85                    |
