# Supplementary material
Source: PubMed Central journal article supplement (PMC4174939)
Supplement: supp_114.166827_TableS3.pdf [file supp_114.166827_TableS3.pdf]

**Table S3 Summary data from comparisons of genotype data in coding regions collected by this study and data collected by the Wellcome Trust.**

| Inbred Line | Bases in<br>common | Mismatches | % mismatch |
|-------------|--------------------|------------|------------|
| PWK         | 13,019,770         | 40         | 0.0003     |
| SPRET       | 13,547,788         | 32         | 0.0002     |
