# Supplementary material
Source: PubMed Central journal article supplement (PMC4174939)
Supplement: supp_114.166827_TableS4.pdf [file supp_114.166827_TableS4.pdf]

**Table S4** The results of a STRUCTURE analysis to determine the probability of different numbers of populations (K) within wild-derived inbred lines sampled from the three subspecies of *M. musculus* after the removal of lines found to be highly admixed in previous runs of STRUCTURE.

| Model        | K              | Average    |        |
|--------------|----------------|------------|--------|
|              |                | ln Pr(X K) | Pr(K)  |
| Admixture    | 1              | -15937.8   | <0.001 |
| Admixture    | 2              | -12492.3   | <0.001 |
| Admixture    | 3 <sup>a</sup> | -8918.2    | >0.999 |
| Admixture    | 4              | -9648.40   | <0.001 |
| Admixture    | 5              | -9603.07   | <0.001 |
| No admixture | 1              | -15932.5   | <0.001 |
| No admixture | 2              | -11890.1   | <0.001 |
| No admixture | 3 <sup>a</sup> | -8879.2    | >0.999 |
| No admixture | 4              | -10641.9   | <0.001 |
| No admixture | 5              | -9059.4    | <0.001 |

<sup>a</sup>In these runs, the lines assigned to the three clusters were consistent with our subspecies assignment as shown in Supporting Information Table 1.
