# Supplementary material
Source: PubMed Central journal article supplement (PMC4174939)
Supplement: supp_114.166827_TableS5.pdf [file supp_114.166827_TableS5.pdf]

**Table S5 Summary statistics describing runs of fixed differences in pairwise comparisons among subspecies of *Mus musculus*.**

| Subspecies 1            | Subspecies 2            | Chr Type  | n   | Avg. # SNPs/run<br>(SD) | Max # of<br>SNPs/run | Avg. Mb covered<br>(SD) | Max Mb<br>covered (SD) |
|-------------------------|-------------------------|-----------|-----|-------------------------|----------------------|-------------------------|------------------------|
| <i>M. m. castaneus</i>  | <i>M. m. domesticus</i> | Autosomes | 98  | 3.07 (1.82)             | 17                   | 3.22 (4.14)             | 20.71                  |
|                         |                         | X         | 1   | 14 (-)                  | (-)                  | 144.19                  | (-)                    |
| <i>M. m. castaneus</i>  | <i>M. m. musculus</i>   | Autosomes | 138 | 4.09 (2.59)             | 19                   | 5.87 (7.59)             | 44.23                  |
|                         |                         | X         | 2   | 5.5 (2.12)              | 41.5                 | 34.96 (8.75)            | 41.5                   |
| <i>M. m. domesticus</i> | <i>M. m. musculus</i>   | Autosomes | 144 | 4.55 (2.75)             | 19                   | 7.17 (8.29)             | 40.99                  |
|                         |                         | X         | 2   | 6.5 (2.54)              | 9                    | 55.30 (37.51)           | 81.83                  |
