# Supplementary material
Source: PubMed Central journal article supplement (PMC4174939)
Supplement: supp_114.166827_TableS6.pdf [file supp_114.166827_TableS6.pdf]

**Table S6 Summary statistics describing runs of fixed differences on chromosome 2 in all pairwise comparisons of the subspecies of *Mus musculus* as well as the percentile rank of those statistics in 10,000 coalescent and recombination simulations.**

| Subspecies              | Subspecies              | # of runs | Perc. Rank | Avg. # of SNPs/run (SD) | Perc. Rank | Max # of SNPs/run | Perc. Rank |
|-------------------------|-------------------------|-----------|------------|-------------------------|------------|-------------------|------------|
| <i>M. m. castaneus</i>  | <i>M. m. domesticus</i> | 9         | 75%        | 2.89 (1.54)             | 67%        | 6                 | 73%        |
| <i>M. m. castaneus</i>  | <i>M. m. musculus</i>   | 11        | 30%        | 3.91 (2.07)             | 66%        | 8                 | 39%        |
| <i>M. m. domesticus</i> | <i>M. m. musculus</i>   | 12        | 49%        | 4.67 (3.31)             | 50%        | 12                | 52%        |
