# Supplementary material
Source: PubMed Central journal article supplement (PMC4174939)
Supplement: supp_114.166827_TableS7.pdf [file supp_114.166827_TableS7.pdf]

**Table S7 Demographic parameters used in ms (Hudson 2002) simulations. All values are based on averages of estimates from Geraldès *et al.* (2011) and assume a generation length of 1 year.**

| Subspecies 1            | Subspecies 2            | $N_{e \text{ species 1}}$ | $N_{e \text{ species 2}}$ | $N_{e \text{ Ancestral}}$ | $t$     | 2Nm<br>(species1) <sup>a</sup> | 2Nm<br>(species2) <sup>b</sup> | Avg. # SNPs<br>surveyed in<br>observed loci<br>(SD) | Avg. # SNPs in<br>simulated loci<br>(SD) |
|-------------------------|-------------------------|---------------------------|---------------------------|---------------------------|---------|--------------------------------|--------------------------------|-----------------------------------------------------|------------------------------------------|
| <i>M. m. castaneus</i>  | <i>M. m. domesticus</i> | 366,700                   | 82,600                    | 277,800                   | 313,800 | 0.193                          | 0.000                          | 2.61 (2.39)                                         | 5.28 (3.05)                              |
| <i>M. m. castaneus</i>  | <i>M. m. musculus</i>   | 366,700                   | 36,600                    | 277,800                   | 345,800 | 0.190                          | 0.058                          | 2.59 (2.36)                                         | 4.90 (2.93)                              |
| <i>M. m. domesticus</i> | <i>M. m. musculus</i>   | 82,600                    | 36,600                    | 277,800                   | 320,800 | 0.003                          | 0.057                          | 2.38 (2.08)                                         | 2.24 (1.29)                              |

<sup>a</sup>The effective rate at which genes enter subspecies 1 from subspecies 2.

<sup>b</sup>The effective rate at which genes enter subspecies 2 from subspecies 1.
