# Supplementary material
Source: PubMed Central journal article supplement (PMC4174939)
Supplement: supp_114.166827_TableS8.pdf [file supp_114.166827_TableS8.pdf]

**Table S8 Average values of  $\delta$  for different classes of sites in all pairwise comparisons between subspecies of *M. musculus*.**

| Subspecies 1            | Subspecies 2            | $\bar{\delta}_{non-synonymous}$ (SD) | $n_{non-synonymous}$ | $\bar{\delta}_{synonymous}$ SD | $n_{synonymous}$ | $P^a$   |
|-------------------------|-------------------------|--------------------------------------|----------------------|--------------------------------|------------------|---------|
| <i>M. m. castaneus</i>  | <i>M. m. domesticus</i> | 0.39 (0.30)                          | 7,118                | 0.40 (0.29)                    | 16,772           | <0.001  |
| <i>M. m. castaneus</i>  | <i>M. m. musculus</i>   | 0.42 (0.31)                          | 6,965                | 0.43 (0.30)                    | 16,503           | <0.0001 |
| <i>M. m. domesticus</i> | <i>M. m. musculus</i>   | 0.48 (0.35)                          | 6,740                | 0.54 (0.35)                    | 14,687           | <0.0001 |

<sup>a</sup>Results of *t*-tests comparing average measures of differentiation for non-synonymous and synonymous sites
