# Supplementary material
Source: PubMed Central journal article supplement (PMC4174939)
Supplement: supp_114.166827_TableS9.pdf [file supp_114.166827_TableS9.pdf]

**Table S9 Demographic parameters used in ms (Hudson 2002) simulations intended to more closely match the number of SNPs surveyed in the observed data.**

| Subspecies 1            | Subspecies 2            | $N_{e \text{ species 1}}$ | $N_{e \text{ species 2}}$ | $N_{e \text{ Ancestral}}$ | $t$     | 2Nm<br>(species1) <sup>a</sup> | 2Nm<br>(species2) <sup>b</sup> | Avg. # SNPs                          | Avg. # SNPs in         |
|-------------------------|-------------------------|---------------------------|---------------------------|---------------------------|---------|--------------------------------|--------------------------------|--------------------------------------|------------------------|
|                         |                         |                           |                           |                           |         |                                |                                | surveyed in<br>observed loci<br>(SD) | simulated loci<br>(SD) |
| <i>M. m. castaneus</i>  | <i>M. m. domesticus</i> | 167,000                   | 101,000                   | 280,000                   | 325,000 | 0.193                          | 0.000                          | 2.61 (2.39)                          | 3.34 (1.93)            |
| <i>M. m. castaneus</i>  | <i>M. m. musculus</i>   | 167,000                   | 89,000                    | 280,000                   | 325,000 | 0.190                          | 0.058                          | 2.59 (2.36)                          | 3.28 (1.90)            |
| <i>M. m. domesticus</i> | <i>M. m. musculus</i>   | 101,000                   | 89,000                    | 280,000                   | 325,000 | 0.003                          | 0.057                          | 2.38 (2.08)                          | 2.65 (1.52)            |

<sup>a</sup>The effective rate at which genes enter subspecies 1 from subspecies 2.

<sup>b</sup>The effective rate at which genes enter subspecies 2 from subspecies 1.
