# Supplementary material
Source: PubMed Central journal article supplement (PMC4174939)
Supplement: supp_114.166827_TableS10.pdf [file supp_114.166827_TableS10.pdf]

**Table S10 Demographic parameters used in ms (Hudson 2002) simulations. Population size estimates are based on averages of estimates from Geraldes *et al.* (2011) and assume a generation length of 1 year. Gene flow was increased until the proportion of simulated loci with low average values of differentiation matched observed proportions.**

| Subspecies 1            | Subspecies 2            | $N_e$ species 1 | $N_e$ species 2 | $N_e$ Ancestral | $t$     | 2Nm<br>(species1) <sup>a</sup> | 2Nm<br>(species2) <sup>b</sup> |
|-------------------------|-------------------------|-----------------|-----------------|-----------------|---------|--------------------------------|--------------------------------|
| <i>M. m. castaneus</i>  | <i>M. m. domesticus</i> | 366,700         | 82,600          | 277,800         | 325,000 | 1.930                          | 0.000                          |
| <i>M. m. castaneus</i>  | <i>M. m. musculus</i>   | 366,700         | 36,600          | 277,800         | 325,000 | 1.330                          | 0.406                          |
| <i>M. m. domesticus</i> | <i>M. m. musculus</i>   | 82,600          | 36,600          | 277,800         | 325,000 | 0.045                          | 0.855                          |

<sup>a</sup>The effective rate at which genes enter subspecies 1 from subspecies 2

<sup>b</sup>The effective rate at which genes enter subspecies 2 from subspecies 1
