# Supplementary material
Source: PubMed Central journal article supplement (PMC4174939)
Supplement: supp_114.166827_TableS11.pdf [file supp_114.166827_TableS11.pdf]

**Table S11** Overlap between inversions and runs of fixed differences identified between each pair of subspecies of *Mus musculus*.

| Subspecies              | Subspecies              | # of runs of fixed differences | Observed overlap with inversions | Perc. Rank |
|-------------------------|-------------------------|--------------------------------|----------------------------------|------------|
| <i>M. m. castaneus</i>  | <i>M. m. domesticus</i> | 99                             | 36                               | 35%        |
| <i>M. m. castaneus</i>  | <i>M. m. musculus</i>   | 140                            | 70                               | 54%        |
| <i>M. m. domesticus</i> | <i>M. m. musculus</i>   | 146                            | 80                               | 98.5%      |
