# Supplementary material
Source: PubMed Central journal article supplement (PMC4174939)
Supplement: supp_114.166827_TableS12.pdf [file supp_114.166827_TableS12.pdf]

**Table S12 Average measures of differentiation in regions containing testis specific genes and all other regions for all pairwise comparisons of *Mus musculus* subspecies.**

| Subspecies              | Subspecies              | Regions                       | n    | $\bar{F}_{st}$ (SD) | t     | $\bar{D}_{xy}$ (SD) | t     | $\bar{\delta}$ (SD) | t     |
|-------------------------|-------------------------|-------------------------------|------|---------------------|-------|---------------------|-------|---------------------|-------|
| <i>M. m. castaneus</i>  | <i>M. m. domesticus</i> | Contain testis specific genes | 520  | 0.24 (0.16)         | 0.41  | 0.42 (0.14)         | 0.29  | 0.41 (0.14)         | 0.16  |
|                         |                         | All Others                    | 1226 | 0.24 (0.19)         |       | 0.42 (0.16)         |       | 0.41 (0.16)         |       |
| <i>M. m. castaneus</i>  | <i>M. m. musculus</i>   | Contain testis specific genes | 515  | 0.29 (0.19)         | 1.73* | 0.47 (0.15)         | 1.47  | 0.46 (0.16)         | 1.64* |
|                         |                         | All Others                    | 1247 | 0.27 (0.20)         |       | 0.45 (0.16)         |       | 0.44 (0.17)         |       |
| <i>M. m. domesticus</i> | <i>M. m. musculus</i>   | Contain testis specific genes | 518  | 0.43 (0.22)         | 2.15* | 0.56 (0.18)         | 1.81* | 0.56 (0.18)         | 1.93* |
|                         |                         | All Others                    | 1364 | 0.41 (0.24)         |       | 0.55 (0.19)         |       | 0.54 (0.20)         |       |

\*P<=0.05 in 1-sided t-tests comparing measures from regions containing testis specific regions and all others.
