# Supplementary material
Source: PubMed Central journal article supplement (PMC4174939)
Supplement: supp_114.166827_TableS13.pdf [file supp_114.166827_TableS13.pdf]

**Table S13 Genes identified in regions of overlap between the results of QTL mapping and our study in comparisons**

**between *M. m. castaneus* and *M. m. domesticus*.**

| Ensembl Gene ID                 | Chr | Gene Start (bp) | Gene End (bp) | Associated Gene Name |
|---------------------------------|-----|-----------------|---------------|----------------------|
| ENSMUSG00000005510              | 2   | 90734791        | 90744984      | <i>Ndufs3</i>        |
| ENSMUSG00000005505              | 2   | 90744897        | 90751783      | <i>Kbtbd4</i>        |
| ENSMUSG00000005506              | 2   | 90780539        | 90859654      | <i>Celf1</i>         |
| ENSMUSG00000002104              | 2   | 90875777        | 90885886      | <i>Rapsn</i>         |
| ENSMUSG00000002102 <sup>a</sup> | 2   | 90894166        | 90906526      | <i>Psmc3</i>         |
| ENSMUSG00000002105              | 2   | 90901948        | 90910574      | <i>Slc39a13</i>      |
| ENSMUSG00000002111              | 2   | 90922547        | 90955913      | <i>Spi1</i>          |
| ENSMUSG00000002100              | 2   | 90958301        | 90976673      | <i>Mybpc3</i>        |
| ENSMUSG000000040687             | 2   | 90977517        | 91023994      | <i>Madd</i>          |
| ENSMUSG00000002108              | 2   | 91024218        | 91042991      | <i>Nr1h3</i>         |
| ENSMUSG00000002103              | 2   | 91043042        | 91054255      | <i>Acp2</i>          |
| ENSMUSG00000002109              | 2   | 91051729        | 91077139      | <i>Ddb2</i>          |
| ENSMUSG00000027257              | 2   | 91096111        | 91104836      | <i>Pacsin3</i>       |
| ENSMUSG00000027255              | 2   | 91105131        | 91117088      | <i>Arfgap2</i>       |
| ENSMUSG00000027253              | 2   | 91297668        | 91354058      | <i>Lrp4</i>          |
| ENSMUSG000000040549             | 2   | 91366919        | 91460821      | <i>Ckap5</i>         |
| ENSMUSG00000027249              | 2   | 91465477        | 91476571      | <i>F2</i>            |
| ENSMUSG00000075040              | 2   | 91483826        | 91489948      | <i>Zfp408</i>        |
| ENSMUSG00000027247              | 2   | 91490017        | 91512483      | <i>Arhgap1</i>       |
| ENSMUSG000000040591             | 2   | 91275068        | 91444704      | <i>1110051M20Rik</i> |
| ENSMUSG00000027244              | 2   | 91514775        | 91550733      | <i>Atg13</i>         |
| ENSMUSG00000027243              | 2   | 91551009        | 91561702      | <i>Harbi1</i>        |
| ENSMUSG000000040506             | 2   | 91570291        | 91759006      | <i>Ambra1</i>        |
| ENSMUSG000000040495             | 2   | 91762346        | 91769986      | <i>Chrm4</i>         |
| ENSMUSG00000027239              | 2   | 91769962        | 91772454      | <i>Mdk</i>           |
| ENSMUSG000000040479             | 2   | 91772981        | 91816021      | <i>Dgkz</i>          |
| ENSMUSG000000095332             | 2   | 91785862        | 91786173      | <i>Gm9821</i>        |
| ENSMUSG00000027230              | 2   | 91815044        | 91864659      | <i>Creb3l1</i>       |
| ENSMUSG00000058318              | 2   | 91933274        | 92204823      | <i>Phf21a</i>        |
| ENSMUSG00000027293              | 2   | 119914911       | 119980342     | <i>Ehd4</i>          |
| ENSMUSG00000050211              | 2   | 119992148       | 120071071     | <i>Pla2g4e</i>       |
| ENSMUSG00000070719              | 2   | 120091331       | 120114933     | <i>Pla2g4d</i>       |
| ENSMUSG000000046971             | 2   | 120125693       | 120139901     | <i>Pla2g4f</i>       |
| ENSMUSG00000027291              | 2   | 120142197       | 120178873     | <i>Vps39</i>         |
| ENSMUSG000000033808             | 2   | 120181045       | 120229852     | <i>Tmem87a</i>       |
| ENSMUSG000000062646             | 2   | 120229632       | 120287436     | <i>Ganc</i>          |
| ENSMUSG00000079110              | 2   | 120281755       | 120330649     | <i>Capn3</i>         |
| ENSMUSG00000027288              | 2   | 120332556       | 120389579     | <i>Zfp106</i>        |
| ENSMUSG000000027287             | 2   | 120393407       | 120426991     | <i>Snap23</i>        |
| ENSMUSG00000027286 <sup>a</sup> | 2   | 120429974       | 120435256     | <i>Lrrc57</i>        |
| ENSMUSG00000027285              | 2   | 120435119       | 120447296     | <i>Haus2</i>         |
| ENSMUSG00000033705              | 2   | 120454862       | 120557633     | <i>Stard9</i>        |
| ENSMUSG00000027284              | 2   | 120541890       | 120675864     | <i>Cdan1</i>         |
| ENSMUSG00000090100 <sup>a</sup> | 2   | 120558552       | 120676340     | <i>Ttbk2</i>         |
| ENSMUSG00000027272              | 2   | 120686005       | 120796451     | <i>Ubr1</i>          |
| ENSMUSG000000054484             | 2   | 120802753       | 120833588     | <i>Tmem62</i>        |
| ENSMUSG00000023572              | 2   | 120834139       | 120842640     | <i>Ccndbp1</i>       |
| ENSMUSG00000023216              | 2   | 120843627       | 120862808     | <i>Epb4.2</i>        |
| ENSMUSG000000053675             | 2   | 120871847       | 120911577     | <i>Tgm5</i>          |
| ENSMUSG00000079103              | 2   | 120919301       | 120935531     | <i>Tgm7</i>          |

<sup>a</sup>indicates genes that are testis-specific.

Table S13. cont'd.

| Ensembl Gene ID                 | Chr | Gene Start<br>(bp) | Gene End<br>(bp) | Associated Gene<br>Name |
|---------------------------------|-----|--------------------|------------------|-------------------------|
| ENSMUSG00000074890              | 2   | 120954043          | 120966434        | <i>Lcmt2</i>            |
| ENSMUSG00000027259              | 2   | 120966164          | 120982416        | <i>Adal</i>             |
| ENSMUSG00000050619              | 2   | 120984009          | 120996861        | <i>Zscan29</i>          |
| ENSMUSG00000027263              | 2   | 120996390          | 121024506        | <i>Tubgcp4</i>          |
| ENSMUSG00000043909              | 2   | 121019017          | 121097143        | <i>Trp53bp1</i>         |
| ENSMUSG00000027254              | 2   | 121115336          | 121136568        | <i>Map1a</i>            |
| ENSMUSG00000033526              | 2   | 121136297          | 121181132        | <i>Ppip5k1</i>          |
| ENSMUSG0000000308               | 2   | 121183450          | 121189473        | <i>Ckmt1</i>            |
| ENSMUSG00000033498              | 2   | 121189464          | 121212904        | <i>Strc</i>             |
| ENSMUSG00000033486 <sup>a</sup> | 2   | 121218367          | 121240317        | <i>Catsper2</i>         |
| ENSMUSG00000027248              | 2   | 121239511          | 121264423        | <i>Pdia3</i>            |
| ENSMUSG00000027246              | 2   | 121264746          | 121270014        | <i>Ell3</i>             |
| ENSMUSG00000046110              | 2   | 121264795          | 121282517        | <i>Serinc4</i>          |
| ENSMUSG00000074884              | 2   | 121274931          | 121284049        | <i>Serf2</i>            |
| ENSMUSG00000027245              | 2   | 121279026          | 121284408        | <i>Hypk</i>             |
| ENSMUSG00000048222              | 2   | 121285971          | 121299803        | <i>Mfap1b</i>           |
| ENSMUSG00000068479              | 2   | 121317647          | 121332401        | <i>Mfap1a</i>           |
| ENSMUSG00000027242              | 2   | 121332459          | 121370596        | <i>Wdr76</i>            |
| ENSMUSG00000027238              | 2   | 121371265          | 121632823        | <i>Frmd5</i>            |
| ENSMUSG00000060227              | 2   | 121692706          | 121761956        | <i>Casc4</i>            |
| ENSMUSG00000074881              | 2   | 121779488          | 121781096        | <i>Mageb3</i>           |
| ENSMUSG00000033411              | 2   | 121781737          | 121839378        | <i>Ctdspl2</i>          |
| ENSMUSG00000027236 <sup>a</sup> | 2   | 121854282          | 121882334        | <i>Eif3j1</i>           |
| ENSMUSG00000033396              | 2   | 121879256          | 121944122        | <i>Spg11</i>            |
| ENSMUSG00000027233              | 2   | 121945844          | 122011925        | <i>Patl2</i>            |
| ENSMUSG00000060802              | 2   | 121973422          | 121978819        | <i>B2m</i>              |
| ENSMUSG00000033368 <sup>a</sup> | 2   | 121986436          | 122004763        | <i>Trim69</i>           |
| ENSMUSG00000027229              | 2   | 122012008          | 122032133        | <i>4933406J08Rik</i>    |
| ENSMUSG00000027227 <sup>a</sup> | 2   | 122060485          | 122091076        | <i>Sord</i>             |
| ENSMUSG00000068452              | 2   | 122104983          | 122124185        | <i>Duox2</i>            |
| ENSMUSG00000027225              | 2   | 122124636          | 122128621        | <i>Duoxa2</i>           |
| ENSMUSG00000027224              | 2   | 122127927          | 122139466        | <i>Duoxa1</i>           |
| ENSMUSG00000033268              | 2   | 122141408          | 122173708        | <i>Duox1</i>            |
| ENSMUSG00000033256              | 2   | 122174628          | 122194898        | <i>Shf</i>              |
| ENSMUSG00000027219              | 2   | 122251126          | 122286873        | <i>Slc28a2</i>          |
| ENSMUSG00000079071              | 2   | 122310677          | 122353776        | <i>Gm14085</i>          |
| ENSMUSG00000073889              | 4   | 41647021           | 41716347         | <i>Il11ra1</i>          |
| ENSMUSG00000028447              | 4   | 41661830           | 41670202         | <i>Dctn3</i>            |
| ENSMUSG00000066224              | 4   | 41670868           | 41678174         | <i>Arid3c</i>           |
| ENSMUSG00000036078              | 4   | 41685366           | 41703030         | <i>Sigmar1</i>          |
| ENSMUSG00000036073              | 4   | 41702101           | 41705998         | <i>Galt</i>             |
| ENSMUSG00000073888 <sup>a</sup> | 4   | 41716340           | 41721120         | <i>Ccl27a</i>           |
| ENSMUSG00000073884              | 4   | 41774204           | 41775337         | <i>Ccl21b</i>           |
| ENSMUSG00000096543              | 4   | 41870187           | 41870612         | <i>Gm21966</i>          |
| ENSMUSG00000094065              | 4   | 41903610           | 41904743         | <i>Gm21541</i>          |
| ENSMUSG00000078747              | 4   | 41941572           | 41943124         | <i>Gm20878</i>          |
| ENSMUSG00000078746              | 4   | 41966058           | 41971856         | <i>Gm20938</i>          |
| ENSMUSG00000096256              | 4   | 42033017           | 42034726         | <i>Gm21093</i>          |
| ENSMUSG00000095611              | 4   | 42035113           | 42035538         | <i>Gm10597</i>          |
| ENSMUSG00000095881              | 4   | 42083899           | 42084291         | <i>Gm21968</i>          |
| ENSMUSG00000094293              | 4   | 42091207           | 42092287         | <i>Gm3893</i>           |
| ENSMUSG00000073878              | 4   | 42114817           | 42115917         | <i>Gm13304</i>          |
| ENSMUSG00000073877 <sup>a</sup> | 4   | 42153436           | 42158839         | <i>Gm13306</i>          |

<sup>a</sup>indicates genes that are testis-specific.

Table S13. cont'd.

| Ensembl Gene ID                 | Chr | Gene Start<br>(bp) | Gene End<br>(bp) | Associated Gene<br>Name |
|---------------------------------|-----|--------------------|------------------|-------------------------|
| ENSMUSG00000073876              | 4   | 42158842           | 42168603         | <i>Gm13305</i>          |
| ENSMUSG00000096609              | 4   | 42170845           | 42171335         | <i>1700045111Rik</i>    |
| ENSMUSG00000094984              | 4   | 42219428           | 42219853         | <i>Gm10595</i>          |
| ENSMUSG00000083929              | 4   | 42240639           | 42242685         | <i>Gm10600</i>          |
| ENSMUSG00000095675              | 4   | 42255767           | 42256432         | <i>Ccl21b</i>           |
| ENSMUSG00000094695              | 4   | 42294267           | 42294855         | <i>Gm21953</i>          |
| ENSMUSG00000093996              | 4   | 42318334           | 42323929         | <i>Gm21598</i>          |
| ENSMUSG00000095234              | 4   | 42439378           | 42439966         | <i>Gm21586</i>          |
| ENSMUSG00000096892              | 4   | 42458751           | 42459176         | <i>Gm10597</i>          |
| ENSMUSG00000093909              | 4   | 42459563           | 42461272         | <i>Gm3883</i>           |
| ENSMUSG00000095779              | 4   | 42466752           | 42589938         | <i>Gm2163</i>           |
| ENSMUSG00000094066              | 4   | 42522580           | 42528175         | <i>Gm13298</i>          |
| ENSMUSG00000096260              | 4   | 42581229           | 42581621         | <i>Gm10592</i>          |
| ENSMUSG00000096596              | 4   | 42612195           | 42612860         | <i>Gm10591</i>          |
| ENSMUSG00000091938              | 4   | 42629719           | 42631714         | <i>Gm2564</i>           |
| ENSMUSG00000096826 <sup>a</sup> | 4   | 42655251           | 42656005         | <i>Ccl27b</i>           |
| ENSMUSG00000078735              | 4   | 42656355           | 42661893         | <i>Il11ra2</i>          |
| ENSMUSG00000094731              | 4   | 42668043           | 42668438         | <i>Gm9969</i>           |
| ENSMUSG00000095375              | 4   | 42714926           | 42719893         | <i>Gm21955</i>          |
| ENSMUSG00000054885              | 4   | 42735545           | 42846248         | <i>4930578G10Rik</i>    |
| ENSMUSG00000071005              | 4   | 42754525           | 42756577         | <i>Ccl19</i>            |
| ENSMUSG00000094686              | 4   | 42772860           | 42773993         | <i>Ccl21a</i>           |
| ENSMUSG00000078722              | 4   | 42781928           | 42856771         | <i>Gm12394</i>          |
| ENSMUSG00000078721              | 4   | 42848071           | 42853888         | <i>Gm12429</i>          |
| ENSMUSG00000050141 <sup>a</sup> | 4   | 42868004           | 42874234         | <i>BC049635</i>         |
| ENSMUSG00000036062              | 4   | 42916660           | 42944752         | <i>N28178</i>           |
| ENSMUSG00000028551              | 4   | 109660876          | 109667189        | <i>Cdkn2c</i>           |
| ENSMUSG00000010517 <sup>a</sup> | 4   | 109676588          | 109963960        | <i>Faf1</i>             |
| ENSMUSG00000029722              | 5   | 137650483          | 137684726        | <i>Agfg2</i>            |
| ENSMUSG00000045348              | 5   | 137730883          | 137741607        | <i>Nyap1</i>            |
| ENSMUSG00000029723 <sup>a</sup> | 5   | 137745730          | 137768450        | <i>Tsc22d4</i>          |
| ENSMUSG00000029659              | 5   | 149411749          | 149431723        | <i>Medag</i>            |
| ENSMUSG00000029660 <sup>a</sup> | 5   | 149439706          | 149470620        | <i>Tex26</i>            |
| ENSMUSG00000029658              | 5   | 149528679          | 149611894        | <i>Wdr95</i>            |
| ENSMUSG00000033174              | 6   | 88724412           | 88828360         | <i>Mgll</i>             |
| ENSMUSG00000030083              | 6   | 88835915           | 88841935         | <i>Abtb1</i>            |
| ENSMUSG00000033152              | 6   | 88842558           | 88875044         | <i>Podxl2</i>           |
| ENSMUSG00000030314              | 6   | 114643097          | 114860614        | <i>Atg7</i>             |
| ENSMUSG00000030315              | 6   | 114860628          | 114969994        | <i>Vgll4</i>            |
| ENSMUSG00000030316              | 6   | 115004381          | 115037876        | <i>Tamm41</i>           |
| ENSMUSG0000009394               | 6   | 115134902          | 115282626        | <i>Syn2</i>             |
| ENSMUSG00000092004              | 6   | 115227343          | 115259294        | <i>Gm17482</i>          |
| ENSMUSG00000030317              | 6   | 115245616          | 115251849        | <i>Timp4</i>            |
| ENSMUSG00000000440              | 6   | 115361221          | 115490401        | <i>Pparg</i>            |
| ENSMUSG00000042389              | 6   | 115544664          | 115578350        | <i>Tsen2</i>            |
| ENSMUSG00000068011              | 6   | 115583544          | 115592576        | <i>2510049J12Rik</i>    |
| ENSMUSG00000000439              | 6   | 115601938          | 115618670        | <i>Mkrr2</i>            |
| ENSMUSG00000000441              | 6   | 115618067          | 115676635        | <i>Raf1</i>             |
| ENSMUSG00000055396              | 6   | 115675995          | 115677136        | <i>D830050J10Rik</i>    |
| ENSMUSG00000059900              | 6   | 115729131          | 115762466        | <i>Tmem40</i>           |
| ENSMUSG00000030319              | 6   | 115774538          | 115804893        | <i>Cand2</i>            |
| ENSMUSG00000071226              | 6   | 120666369          | 120771190        | <i>Cecr2</i>            |
| ENSMUSG00000004902              | 6   | 120773768          | 120793982        | <i>Slc25a18</i>         |
| ENSMUSG00000019210              | 6   | 120795245          | 120822685        | <i>Atp6v1e1</i>         |

<sup>a</sup>indicates genes that are testis-specific.

Table S13. cont'd.

| Ensembl Gene ID                  | Chr | Gene Start<br>(bp) | Gene End<br>(bp) | Associated Gene<br>Name |
|----------------------------------|-----|--------------------|------------------|-------------------------|
| ENSMUSG00000009112               | 6   | 120836230          | 120892842        | <i>Bcl2l13</i>          |
| ENSMUSG00000004446               | 6   | 120891930          | 120916853        | <i>Bid</i>              |
| ENSMUSG000000051586              | 6   | 120931707          | 121003153        | <i>Mical3</i>           |
| ENSMUSG00000003178               | 6   | 121007241          | 121081609        | <i>Mical3</i>           |
| ENSMUSG000000030143              | 6   | 132361041          | 132364134        | <i>Gm8882</i>           |
| ENSMUSG000000059934              | 6   | 132569809          | 132572941        | <i>Prh1</i>             |
| ENSMUSG000000058295              | 6   | 132595913          | 132601236        | <i>Prp2</i>             |
| ENSMUSG000000067541              | 6   | 132625111          | 132627511        | <i>A630073D07Rik</i>    |
| ENSMUSG000000059382              | 6   | 132656957          | 132657844        | <i>Tas2r120</i>         |
| ENSMUSG000000071150              | 6   | 132700090          | 132701007        | <i>Tas2r121</i>         |
| ENSMUSG000000078280              | 6   | 132710999          | 132711928        | <i>Tas2r122</i>         |
| ENSMUSG000000071149              | 6   | 132737010          | 132738035        | <i>Tas2r115</i>         |
| ENSMUSG000000060412              | 6   | 132754730          | 132755659        | <i>Tas2r124</i>         |
| ENSMUSG000000056901              | 6   | 132762131          | 132763174        | <i>Tas2r102</i>         |
| ENSMUSG000000053217              | 6   | 132777179          | 132778162        | <i>Tas2r136</i>         |
| ENSMUSG000000058349              | 6   | 132802818          | 132803975        | <i>Tas2r117</i>         |
| ENSMUSG000000057381              | 6   | 132847142          | 132848143        | <i>Tas2r123</i>         |
| ENSMUSG000000030194              | 6   | 132855438          | 132856355        | <i>Tas2r116</i>         |
| ENSMUSG000000062952              | 6   | 132868008          | 132869009        | <i>Tas2r110</i>         |
| ENSMUSG000000056926              | 6   | 132893011          | 132893940        | <i>Tas2r113</i>         |
| ENSMUSG000000059410              | 6   | 132909651          | 132910587        | <i>Tas2r125</i>         |
| ENSMUSG000000063762              | 6   | 132951102          | 132952064        | <i>Tas2r129</i>         |
| ENSMUSG000000057699              | 6   | 132956884          | 132957919        | <i>Tas2r131</i>         |
| ENSMUSG000000062528              | 6   | 132980015          | 132980965        | <i>Tas2r109</i>         |
| ENSMUSG000000030196              | 6   | 133036163          | 133037101        | <i>Tas2r103</i>         |
| ENSMUSG000000071147              | 6   | 133054817          | 133055816        | <i>Tas2r140</i>         |
| ENSMUSG000000072704              | 6   | 133105239          | 133107747        | <i>2700089E24Rik</i>    |
| ENSMUSG000000055594              | 6   | 133292216          | 133295790        | <i>5530400C23Rik</i>    |
| ENSMUSG000000095412              | 6   | 133529189          | 133532762        | <i>Gm5885</i>           |
| ENSMUSG000000032758              | 6   | 133849855          | 133853667        | <i>Kap</i>              |
| ENSMUSG000000030199              | 6   | 134035700          | 134270158        | <i>Etv6</i>             |
| ENSMUSG000000030200              | 6   | 134396318          | 134438736        | <i>Bcl2l14</i>          |
| ENSMUSG000000035919 <sup>a</sup> | 9   | 22475715           | 22888280         | <i>Bbs9</i>             |
| ENSMUSG000000020052              | 10  | 87490819           | 87493660         | <i>Ascl1</i>            |
| ENSMUSG000000020051              | 10  | 87521795           | 87584136         | <i>Pah</i>              |
| ENSMUSG000000020053              | 10  | 87858265           | 87937042         | <i>Igf1</i>             |
| ENSMUSG000000035383              | 10  | 88091072           | 88092375         | <i>Pmch</i>             |
| ENSMUSG000000035365 <sup>a</sup> | 10  | 88091432           | 88146941         | <i>Parppb</i>           |
| ENSMUSG000000035351 <sup>a</sup> | 10  | 88146992           | 88178388         | <i>Nup37</i>            |
| ENSMUSG000000020056 <sup>a</sup> | 10  | 88201093           | 88246158         | <i>Ccdc53</i>           |
| ENSMUSG000000020057              | 10  | 88322804           | 88379080         | <i>Dram1</i>            |
| ENSMUSG000000035311              | 10  | 88379132           | 88447329         | <i>Gnptab</i>           |
| ENSMUSG000000060002              | 10  | 88452745           | 88504073         | <i>Chpt1</i>            |
| ENSMUSG000000020059 <sup>a</sup> | 10  | 88459569           | 88473236         | <i>Sycp3</i>            |
| ENSMUSG000000020061              | 10  | 88518279           | 88605152         | <i>Mybpc1</i>           |
| ENSMUSG00000004359               | 10  | 88674772           | 88685015         | <i>Spic</i>             |
| ENSMUSG000000060904              | 10  | 88730858           | 88744094         | <i>Arl1</i>             |
| ENSMUSG00000004356               | 10  | 88746607           | 88826814         | <i>Utp20</i>            |
| ENSMUSG000000020062              | 10  | 88885992           | 88929505         | <i>Slc5a8</i>           |
| ENSMUSG000000035189              | 10  | 88948994           | 89344762         | <i>Ano4</i>             |
| ENSMUSG000000074802              | 10  | 89408823           | 89443967         | <i>Gas2l3</i>           |
| ENSMUSG000000047638              | 10  | 89454234           | 89533585         | <i>Nr1h4</i>            |
| ENSMUSG000000019935              | 10  | 89574020           | 89621253         | <i>Slc17a8</i>          |
| ENSMUSG000000019906 <sup>a</sup> | 10  | 107271843          | 107425143        | <i>Lin7a</i>            |

<sup>a</sup>indicates genes that are testis-specific.

Table S13. cont'd.

| Ensembl Gene ID     | Chr | Gene Start<br>(bp) | Gene End<br>(bp) | Associated Gene<br>Name |
|---------------------|-----|--------------------|------------------|-------------------------|
| ENSMUSG00000000435  | 10  | 107482908          | 107486134        | <i>Myf5</i>             |
| ENSMUSG000000035923 | 10  | 107492860          | 107494729        | <i>Myf6</i>             |
| ENSMUSG000000035916 | 10  | 107517360          | 107720027        | <i>Ptprq</i>            |
| ENSMUSG000000091455 | 10  | 107762223          | 107912134        | <i>Otogl</i>            |
| ENSMUSG000000019907 | 10  | 108162400          | 108277575        | <i>Ppp1r12a</i>         |
| ENSMUSG000000035873 | 10  | 108332189          | 108414391        | <i>Pawr</i>             |
| ENSMUSG000000035864 | 10  | 108497650          | 109010982        | <i>Syt1</i>             |
| ENSMUSG000000020181 | 10  | 109682660          | 110000219        | <i>Nav3</i>             |

<sup>a</sup>indicates genes that are testis-specific.
