# Supplementary material
Source: PubMed Central journal article supplement (PMC4174939)
Supplement: supp_114.166827_TableS14.pdf [file supp_114.166827_TableS14.pdf]

**Table S14 Genes identified in regions of overlap between the results of QTL mapping, a study of the hybrid zone, and our study in comparisons between *M. m. musculus* and *M. m. domesticus*.**

| Ensembl Gene ID                 | Chr | Gene Start<br>(bp) | Gene End<br>(bp) | Associated Gene Name |
|---------------------------------|-----|--------------------|------------------|----------------------|
| ENSMUSG00000040152              | 2   | 118111876          | 118127133        | <i>Thbs1</i>         |
| ENSMUSG00000027344 <sup>a</sup> | 2   | 118204888          | 118256966        | <i>Fsip1</i>         |
| ENSMUSG00000040133              | 2   | 118277110          | 118373419        | <i>Gpr176</i>        |
| ENSMUSG00000005102              | 2   | 118388618          | 118475234        | <i>Eif2ak4</i>       |
| ENSMUSG00000009549 <sup>a</sup> | 2   | 118475850          | 118479711        | <i>Srp14</i>         |
| ENSMUSG00000040093              | 2   | 118528757          | 118549687        | <i>Bmf</i>           |
| ENSMUSG00000040084              | 2   | 118598211          | 118641591        | <i>Bub1b</i>         |
| ENSMUSG00000074923              | 2   | 118663303          | 118698020        | <i>Pak6</i>          |
| ENSMUSG00000078137              | 2   | 118699103          | 118703963        | <i>Ankrd63</i>       |
| ENSMUSG00000040061              | 2   | 118707517          | 118728438        | <i>Plcb2</i>         |
| ENSMUSG00000045838              | 2   | 118754158          | 118762661        | <i>A430105I19Rik</i> |
| ENSMUSG00000046804              | 2   | 118772769          | 118778165        | <i>Phgr1</i>         |
| ENSMUSG00000040035              | 2   | 118779719          | 118811293        | <i>Disp2</i>         |
| ENSMUSG00000027331              | 2   | 118814003          | 118853957        | <i>Knstrn</i>        |
| ENSMUSG00000027332              | 2   | 118861954          | 118882909        | <i>Ivd</i>           |
| ENSMUSG00000040007              | 2   | 118900377          | 118924528        | <i>Bahd1</i>         |
| ENSMUSG00000074916              | 2   | 118926497          | 118928585        | <i>Chst14</i>        |
| ENSMUSG00000039983              | 2   | 119017779          | 119029393        | <i>Ccdc32</i>        |
| ENSMUSG00000027324              | 2   | 119034790          | 119039769        | <i>Rpusd2</i>        |
| ENSMUSG00000027326 <sup>a</sup> | 2   | 119047119          | 119105501        | <i>Casc5</i>         |
| ENSMUSG00000027323 <sup>a</sup> | 2   | 119112793          | 119147445        | <i>Rad51</i>         |
| ENSMUSG00000070730              | 2   | 119137001          | 119157034        | <i>Rmdn3</i>         |
| ENSMUSG00000046814              | 2   | 119167773          | 119172390        | <i>Gchfr</i>         |
| ENSMUSG00000034278              | 2   | 119172500          | 119208795        | <i>Dnajc17</i>       |
| ENSMUSG00000055926              | 2   | 119174509          | 119177575        | <i>Gm14137</i>       |
| ENSMUSG00000068580 <sup>a</sup> | 2   | 119208617          | 119217049        | <i>Zfyve19</i>       |
| ENSMUSG00000027317              | 2   | 119218119          | 119229906        | <i>Ppp1r14d</i>      |
| ENSMUSG00000027315              | 2   | 119237362          | 119249527        | <i>Spint1</i>        |
| ENSMUSG00000034226 <sup>a</sup> | 2   | 119269201          | 119271272        | <i>Rhov</i>          |
| ENSMUSG00000034216              | 2   | 119288740          | 119298453        | <i>Vps18</i>         |
| ENSMUSG00000027314              | 2   | 119325784          | 119335962        | <i>Dll4</i>          |
| ENSMUSG00000027313              | 2   | 119351229          | 119354381        | <i>Chac1</i>         |
| ENSMUSG00000034154              | 2   | 119373042          | 119477687        | <i>Ino80</i>         |
| ENSMUSG00000048647              | 2   | 119516505          | 119547627        | <i>Exd1</i>          |
| ENSMUSG00000014077              | 2   | 119547697          | 119587027        | <i>Chp1</i>          |
| ENSMUSG00000072980              | 2   | 119609512          | 119618469        | <i>Oip5</i>          |
| ENSMUSG00000027306              | 2   | 119618298          | 119651244        | <i>Nusap1</i>        |
| ENSMUSG00000027305              | 2   | 119655446          | 119662827        | <i>Ndufaf1</i>       |
| ENSMUSG00000027304              | 2   | 119675068          | 119735407        | <i>Rtf1</i>          |
| ENSMUSG00000027296              | 2   | 119742337          | 119751263        | <i>Itpka</i>         |
| ENSMUSG00000027297              | 2   | 119751320          | 119760431        | <i>Ltk</i>           |
| ENSMUSG00000034032              | 2   | 119763304          | 119787537        | <i>Rpap1</i>         |
| ENSMUSG00000027298              | 2   | 119797733          | 119818104        | <i>Tyro3</i>         |
| ENSMUSG00000028524              | 4   | 102741297          | 102973628        | <i>Sgip1</i>         |
| ENSMUSG00000028523 <sup>a</sup> | 4   | 102986379          | 103005594        | <i>Tctex1d1</i>      |
| ENSMUSG00000066090              | 4   | 103017872          | 103026842        | <i>Insl5</i>         |
| ENSMUSG00000035126 <sup>a</sup> | 4   | 103038065          | 103114555        | <i>Wdr78</i>         |
| ENSMUSG00000028522 <sup>a</sup> | 4   | 103114390          | 103165754        | <i>Mier1</i>         |
| ENSMUSG00000028521              | 4   | 103170649          | 103215164        | <i>Slc35d1</i>       |

<sup>a</sup>indicates genes that are testis-specific.

Table S14. cont'd.

| Ensembl Gene ID                 | Chr | Gene Start (bp) | Gene End (bp) | Associated Gene Name |
|---------------------------------|-----|-----------------|---------------|----------------------|
| ENSMUSG00000028520 <sup>a</sup> | 4   | 103230445       | 103290863     | <i>4921539E11Rik</i> |
| ENSMUSG00000035069              | 4   | 103313812       | 103371868     | <i>Oma1</i>          |
| ENSMUSG00000028519              | 4   | 103619359       | 104744844     | <i>Dab1</i>          |
| ENSMUSG00000070886              | 4   | 104328252       | 104330557     | <i>Gm10304</i>       |
| ENSMUSG00000029656              | 4   | 104766317       | 104804548     | <i>C8b</i>           |
| ENSMUSG00000035031              | 4   | 104815679       | 104876398     | <i>C8a</i>           |
| ENSMUSG00000095386              | 4   | 104857329       | 104859137     | <i>Gm17662</i>       |
| ENSMUSG00000078612              | 4   | 104913456       | 105016863     | <i>1700024P16Rik</i> |
| ENSMUSG00000028518              | 4   | 105029874       | 105109890     | <i>Prkaa2</i>        |
| ENSMUSG00000028517              | 4   | 105157347       | 105232764     | <i>Ppap2b</i>        |
| ENSMUSG00000029705              | 5   | 136248135       | 136567490     | <i>Cux1</i>          |
| ENSMUSG00000046548              | 5   | 136613702       | 136615328     | <i>4731417B20Rik</i> |
| ENSMUSG00000005474 <sup>a</sup> | 5   | 136693146       | 136701094     | <i>Myl10</i>         |
| ENSMUSG00000004415              | 5   | 136741759       | 136883209     | <i>Col26a1</i>       |
| ENSMUSG00000007987 <sup>a</sup> | 5   | 136908150       | 136913244     | <i>Rab15</i>         |
| ENSMUSG00000019054              | 5   | 136953275       | 136966234     | <i>Fis1</i>          |
| ENSMUSG00000001739              | 5   | 136966616       | 136975858     | <i>Cldn15</i>        |
| ENSMUSG00000059518 <sup>a</sup> | 5   | 136982164       | 136988021     | <i>Znhit1</i>        |
| ENSMUSG00000004846              | 5   | 136987019       | 136996648     | <i>Plod3</i>         |
| ENSMUSG000000037428             | 5   | 137030295       | 137033351     | <i>Vgf</i>           |
| ENSMUSG00000004849              | 5   | 137034993       | 137046135     | <i>Ap1s1</i>         |
| ENSMUSG000000037411             | 5   | 137061504       | 137072272     | <i>Serpine1</i>      |
| ENSMUSG00000043279              | 5   | 137105644       | 137116209     | <i>Trim56</i>        |
| ENSMUSG00000037390 <sup>a</sup> | 5   | 137134924       | 137149320     | <i>Muc3</i>          |
| ENSMUSG00000079174              | 5   | 137154030       | 137166001     | <i>Gm3054</i>        |
| ENSMUSG00000094840              | 5   | 137208813       | 137212389     | <i>A630081J09Rik</i> |
| ENSMUSG00000023328              | 5   | 137287519       | 137294466     | <i>Ache</i>          |
| ENSMUSG00000051502              | 5   | 137294669       | 137295664     | <i>Ufsp1</i>         |
| ENSMUSG00000037364 <sup>a</sup> | 5   | 137295704       | 137307674     | <i>Srrt</i>          |
| ENSMUSG00000023348              | 5   | 137309899       | 137314241     | <i>Trip6</i>         |
| ENSMUSG00000037344              | 5   | 137314558       | 137333597     | <i>Slc12a9</i>       |
| ENSMUSG00000029710              | 5   | 137350109       | 137378669     | <i>Ephb4</i>         |
| ENSMUSG000000079173             | 5   | 137378637       | 137477064     | <i>Zan</i>           |
| ENSMUSG00000029711              | 5   | 137483020       | 137533242     | <i>Epo</i>           |
| ENSMUSG00000029715              | 5   | 137501438       | 137502518     | <i>Pop7</i>          |
| ENSMUSG00000029714              | 5   | 137518880       | 137527934     | <i>Gigyf1</i>        |
| ENSMUSG00000029713              | 5   | 137528127       | 137533510     | <i>Gnb2</i>          |
| ENSMUSG00000029712              | 5   | 137553517       | 137569582     | <i>Actl6b</i>        |
| ENSMUSG00000029716              | 5   | 137569851       | 137587481     | <i>Tfr2</i>          |
| ENSMUSG00000037221              | 5   | 137596645       | 137601058     | <i>Mospd3</i>        |
| ENSMUSG00000029718              | 5   | 137605103       | 137613784     | <i>Pcolce</i>        |
| ENSMUSG00000089984 <sup>a</sup> | 5   | 137612503       | 137629002     | <i>Fbxo24</i>        |
| ENSMUSG00000093445              | 5   | 137629121       | 137641099     | <i>Lrch4</i>         |
| ENSMUSG00000029720              | 5   | 137629175       | 137642899     | <i>Gm20605</i>       |
| ENSMUSG00000079165              | 5   | 137641334       | 137642902     | <i>Sap25</i>         |
| ENSMUSG00000047182              | 5   | 137643032       | 137645714     | <i>Irs3</i>          |
| ENSMUSG00000029722              | 5   | 137650483       | 137684726     | <i>Agfg2</i>         |
| ENSMUSG00000045348              | 5   | 137730883       | 137741607     | <i>Nyap1</i>         |
| ENSMUSG00000029723 <sup>a</sup> | 5   | 137745730       | 137768450     | <i>Tsc22d4</i>       |
| ENSMUSG00000029725 <sup>a</sup> | 5   | 137778849       | 137780110     | <i>Ppp1r35</i>       |
| ENSMUSG00000029726 <sup>a</sup> | 5   | 137781906       | 137786715     | <i>Mepce</i>         |
| ENSMUSG00000037108              | 5   | 137787798       | 137822621     | <i>Zcwpw1</i>        |
| ENSMUSG00000046245              | 5   | 137821952       | 137836268     | <i>Pilra</i>         |

<sup>a</sup>indicates genes that are testis-specific.

Table S14. cont'd.

| Ensembl Gene ID                 | Chr | Gene Start (bp) | Gene End (bp) | Associated Gene Name |
|---------------------------------|-----|-----------------|---------------|----------------------|
| ENSMUSG00000066684              | 5   | 137852147       | 137858049     | <i>Pilrb1</i>        |
| ENSMUSG00000066682              | 5   | 137865829       | 137871758     | <i>Pilrb2</i>        |
| ENSMUSG00000029727              | 5   | 137892932       | 137921619     | <i>Cyp3a13</i>       |
| ENSMUSG00000056966              | 5   | 137953809       | 137962959     | <i>Gjc3</i>          |
| ENSMUSG00000037053              | 5   | 137981521       | 137990233     | <i>Azgp1</i>         |
| ENSMUSG00000075599              | 5   | 138021276       | 138034665     | <i>Smok3a</i>        |
| ENSMUSG00000079156              | 5   | 138021429       | 138050636     | <i>Smok3b</i>        |
| ENSMUSG00000029729              | 5   | 138085084       | 138107822     | <i>Zkscan1</i>       |
| ENSMUSG00000037017 <sup>a</sup> | 5   | 138116903       | 138134265     | <i>Zscan21</i>       |
| ENSMUSG00000037007              | 5   | 138139702       | 138155744     | <i>Zfp113</i>        |
| ENSMUSG00000019494              | 5   | 138161071       | 138164646     | <i>Cops6</i>         |
| ENSMUSG00000029730 <sup>a</sup> | 5   | 138164583       | 138172422     | <i>Mcm7</i>          |
| ENSMUSG00000019518              | 5   | 138172002       | 138178708     | <i>Ap4m1</i>         |
| ENSMUSG00000036980 <sup>a</sup> | 5   | 138178617       | 138187451     | <i>Taf6</i>          |
| ENSMUSG00000036968              | 5   | 138187485       | 138193918     | <i>Cnpy4</i>         |
| ENSMUSG00000049285              | 5   | 138194314       | 138195621     | <i>Mblac1</i>        |
| ENSMUSG00000089783              | 5   | 138203609       | 138207308     | <i>Gm454</i>         |
| ENSMUSG00000047592              | 5   | 138225898       | 138253363     | <i>Nxpe5</i>         |
| ENSMUSG00000050552              | 5   | 138255608       | 138259398     | <i>Lamtor4</i>       |
| ENSMUSG00000036948              | 5   | 138259656       | 138264046     | <i>BC037034</i>      |
| ENSMUSG00000091964              | 5   | 138259658       | 138264046     | <i>BC037034</i>      |
| ENSMUSG00000075593              | 5   | 138264921       | 138272840     | <i>Gal3st4</i>       |
| ENSMUSG00000029510              | 5   | 138264952       | 138280005     | <i>Gpc2</i>          |
| ENSMUSG00000036928 <sup>a</sup> | 5   | 138280240       | 138312393     | <i>Stag3</i>         |
| ENSMUSG00000075591              | 5   | 138363719       | 138388287     | <i>Gm10874</i>       |
| ENSMUSG00000036898              | 5   | 138441468       | 138460694     | <i>Zfp157</i>        |
| ENSMUSG00000029526              | 5   | 138561840       | 138564694     | <i>1700123K08Rik</i> |
| ENSMUSG00000058291              | 5   | 138604616       | 138619761     | <i>Zfp68</i>         |
| ENSMUSG00000056014              | 5   | 138622859       | 138648903     | <i>A430033K04Rik</i> |
| ENSMUSG00000025854              | 5   | 138754514       | 138810077     | <i>Fam20c</i>        |
| ENSMUSG00000094504              | 5   | 138820080       | 138821619     | <i>Gm5294</i>        |
| ENSMUSG00000025856              | 5   | 138976014       | 138997370     | <i>Pdgfa</i>         |
| ENSMUSG00000075585              | 5   | 138995056       | 139000576     | <i>6330403L08Rik</i> |
| ENSMUSG00000025855              | 5   | 139017306       | 139150001     | <i>Prkar1b</i>       |
| ENSMUSG00000025857              | 5   | 139150223       | 139186510     | <i>Heatr2</i>        |
| ENSMUSG00000036817              | 5   | 139200637       | 139249840     | <i>Sun1</i>          |
| ENSMUSG00000025858              | 5   | 139252324       | 139270051     | <i>Get4</i>          |
| ENSMUSG00000056413              | 5   | 139271876       | 139325622     | <i>Adap1</i>         |
| ENSMUSG00000045438              | 5   | 139336189       | 139345233     | <i>Cox19</i>         |
| ENSMUSG00000029541              | 5   | 139352617       | 139357033     | <i>Cyp2w1</i>        |
| ENSMUSG00000053553              | 5   | 139359739       | 139460502     | <i>3110082117Rik</i> |
| ENSMUSG00000044197              | 5   | 139377742       | 139396415     | <i>Gpr146</i>        |
| ENSMUSG00000021206              | 5   | 139378220       | 139379259     | <i>D830046C22Rik</i> |
| ENSMUSG00000044092              | 5   | 139405280       | 139415623     | <i>C130050O18Rik</i> |
| ENSMUSG00000053647              | 5   | 139423151       | 139427800     | <i>Gper1</i>         |
| ENSMUSG00000053581              | 5   | 139471211       | 139484549     | <i>Zfand2a</i>       |
| ENSMUSG00000029546              | 5   | 139543494       | 139548179     | <i>Uncx</i>          |
| ENSMUSG00000036718              | 5   | 139706693       | 139736336     | <i>Micall2</i>       |
| ENSMUSG00000029547              | 5   | 139751282       | 139775678     | <i>Ints1</i>         |
| ENSMUSG00000018143              | 5   | 139791513       | 139802653     | <i>Mafk</i>          |
| ENSMUSG00000036687 <sup>a</sup> | 5   | 139802485       | 139819917     | <i>Tmem184a</i>      |
| ENSMUSG00000098140              | 5   | 139807978       | 139826407     | <i>Gm26938</i>       |
| ENSMUSG00000029551              | 5   | 139823592       | 139826885     | <i>Psmg3</i>         |

<sup>a</sup>indicates genes that are testis-specific.

Table S14. cont'd.

| Ensembl Gene ID                  | Chr | Gene Start (bp) | Gene End (bp) | Associated Gene Name |
|----------------------------------|-----|-----------------|---------------|----------------------|
| ENSMUSG00000048988               | 5   | 139907943       | 139974711     | <i>Elfn1</i>         |
| ENSMUSG000000031737              | 8   | 92357796        | 92361456      | <i>Irx5</i>          |
| ENSMUSG000000031738              | 8   | 92674289        | 92680956      | <i>Irx6</i>          |
| ENSMUSG000000031740              | 8   | 92827328        | 92853417      | <i>Mmp2</i>          |
| ENSMUSG000000033192              | 8   | 92855350        | 92919279      | <i>Lpcat2</i>        |
| ENSMUSG000000078144              | 8   | 92901395        | 92902409      | <i>Capns2</i>        |
| ENSMUSG000000055368              | 8   | 92960079        | 93001667      | <i>Slc6a2</i>        |
| ENSMUSG000000071047              | 8   | 93020214        | 93048192      | <i>Ces1a</i>         |
| ENSMUSG000000078964              | 8   | 93056727        | 93080017      | <i>Ces1b</i>         |
| ENSMUSG000000057400              | 8   | 93099015        | 93131283      | <i>Ces1c</i>         |
| ENSMUSG000000056973              | 8   | 93166068        | 93197838      | <i>Ces1d</i>         |
| ENSMUSG000000061959              | 8   | 93201218        | 93229619      | <i>Ces1e</i>         |
| ENSMUSG000000031725              | 8   | 93256236        | 93279747      | <i>Ces1f</i>         |
| ENSMUSG000000057074              | 8   | 93302369        | 93337308      | <i>Ces1g</i>         |
| ENSMUSG000000074156              | 8   | 93351843        | 93363676      | <i>Ces1h</i>         |
| ENSMUSG000000058019              | 8   | 93499213        | 93535707      | <i>Ces5a</i>         |
| ENSMUSG000000031748              | 8   | 93809966        | 93969388      | <i>Gnao1</i>         |
| ENSMUSG000000031751              | 8   | 93971588        | 94012663      | <i>Amfr</i>          |
| ENSMUSG000000031754 <sup>a</sup> | 8   | 94017770        | 94037021      | <i>Nudt21</i>        |
| ENSMUSG000000033009              | 8   | 94037198        | 94067921      | <i>Ogfod1</i>        |
| ENSMUSG000000031755              | 8   | 94067954        | 94098811      | <i>Bbs2</i>          |
| ENSMUSG000000031757              | 8   | 94137204        | 94139031      | <i>Mt4</i>           |
| ENSMUSG000000031760              | 8   | 94152607        | 94154148      | <i>Mt3</i>           |
| ENSMUSG000000031762              | 8   | 94172618        | 94173567      | <i>Mt2</i>           |
| ENSMUSG000000031765              | 8   | 94179089        | 94180325      | <i>Mt1</i>           |
| ENSMUSG000000032939              | 8   | 94214597        | 94315066      | <i>Nup93</i>         |
| ENSMUSG000000031766              | 8   | 94329192        | 94366213      | <i>Slc12a3</i>       |
| ENSMUSG000000031770              | 8   | 94386438        | 94395377      | <i>Herpud1</i>       |
| ENSMUSG000000074151              | 8   | 94472763        | 94527272      | <i>Nlrc5</i>         |
| ENSMUSG000000034361              | 8   | 94532990        | 94570529      | <i>Cpne2</i>         |
| ENSMUSG000000031774              | 8   | 94574943        | 94601726      | <i>Fam192a</i>       |
| ENSMUSG000000050079 <sup>a</sup> | 8   | 94601955        | 94660275      | <i>Rspry1</i>        |
| ENSMUSG000000031776 <sup>a</sup> | 8   | 94666755        | 94674417      | <i>Arl2bp</i>        |
| ENSMUSG000000031775              | 8   | 94674895        | 94696242      | <i>Plip</i>          |
| ENSMUSG000000031779              | 8   | 94745590        | 94751699      | <i>Ccl22</i>         |
| ENSMUSG000000031778              | 8   | 94772009        | 94782423      | <i>Cx3cl1</i>        |
| ENSMUSG000000031780              | 8   | 94810453        | 94812035      | <i>Ccl17</i>         |
| ENSMUSG000000031781              | 8   | 94819818        | 94838358      | <i>Ciapin1</i>       |
| ENSMUSG000000031782              | 8   | 94838321        | 94854895      | <i>Coq9</i>          |
| ENSMUSG000000031783              | 8   | 94857450        | 94864242      | <i>Polr2c</i>        |
| ENSMUSG000000040631              | 8   | 94863828        | 94876312      | <i>Dok4</i>          |
| ENSMUSG000000063605              | 8   | 94902869        | 94918098      | <i>Ccdc102a</i>      |
| ENSMUSG000000061577              | 8   | 94923694        | 94943290      | <i>Gpr114</i>        |
| ENSMUSG000000031785              | 8   | 94977109        | 95014208      | <i>Gpr56</i>         |
| ENSMUSG000000022295              | 15  | 38661904        | 38692443      | <i>Atp6v1c1</i>      |
| ENSMUSG000000022296              | 15  | 38933142        | 38949405      | <i>Baalc</i>         |
| ENSMUSG000000022297              | 15  | 39006280        | 39038186      | <i>Fzd6</i>          |
| ENSMUSG000000054196              | 15  | 39076932        | 39087121      | <i>Cthrc1</i>        |
| ENSMUSG000000022299              | 15  | 39094191        | 39112716      | <i>Slc25a32</i>      |
| ENSMUSG000000022300              | 15  | 39112874        | 39146856      | <i>Dcaf13</i>        |
| ENSMUSG000000037386              | 15  | 39198332        | 39681940      | <i>Rims2</i>         |
| ENSMUSG000000022303              | 15  | 39745932        | 39760934      | <i>Dcstamp</i>       |
| ENSMUSG000000022304              | 15  | 39768485        | 39857470      | <i>Dpys</i>          |
| ENSMUSG000000022305              | 15  | 39870603        | 39943994      | <i>Lrp12</i>         |

<sup>a</sup>indicates genes that are testis-specific.

Table S14. cont'd.

| Ensembl Gene ID                 | Chr | Gene Start (bp) | Gene End (bp) | Associated Gene Name |
|---------------------------------|-----|-----------------|---------------|----------------------|
| ENSMUSG00000094112              | 15  | 40142188        | 40148689      | <i>9330182014Rik</i> |
| ENSMUSG00000022306              | 15  | 40655042        | 41104592      | <i>Zfpm2</i>         |
| ENSMUSG00000022307              | 15  | 41447482        | 41861048      | <i>Oxr1</i>          |
| ENSMUSG00000042895              | 15  | 41865293        | 41869720      | <i>Abra</i>          |
| ENSMUSG00000022309              | 15  | 42424727        | 42676977      | <i>Angpt1</i>        |
| ENSMUSG00000051920              | 15  | 43020811        | 43170818      | <i>Rspo2</i>         |
| ENSMUSG00000022336              | 15  | 43250040        | 43282736      | <i>Eif3e</i>         |
| ENSMUSG00000072592              | 15  | 43430943        | 43477036      | <i>Gm10373</i>       |
| ENSMUSG00000022337              | 15  | 43477229        | 43527777      | <i>Emc2</i>          |
| ENSMUSG00000054409              | 15  | 43866695        | 43870029      | <i>Tmem74</i>        |
| ENSMUSG00000048915              | 17  | 62604184        | 62881317      | <i>Efna5</i>         |
| ENSMUSG00000090425              | 17  | 62604292        | 62606707      | <i>Efna5</i>         |
| ENSMUSG00000023965 <sup>a</sup> | 17  | 63057452        | 63500017      | <i>Fbxl17</i>        |
| ENSMUSG00000045506              | 17  | 63863300        | 63863791      | <i>A930002H24Rik</i> |
| ENSMUSG00000000127              | 17  | 63896018        | 64139494      | <i>Fer</i>           |
| ENSMUSG00000024083              | 17  | 64281005        | 64331916      | <i>Pja2</i>          |
| ENSMUSG00000073377              | 17  | 64514081        | 64555660      | <i>AU016765</i>      |
| ENSMUSG00000024085              | 17  | 64600736        | 64755110      | <i>Man2a1</i>        |
| ENSMUSG00000024088              | 17  | 64832523        | 64836071      | <i>4930583109Rik</i> |
| ENSMUSG00000045036 <sup>a</sup> | 17  | 65256005        | 65540782      | <i>Tmem232</i>       |
| ENSMUSG00000024091              | 17  | 65580056        | 65613555      | <i>Vapa</i>          |
| ENSMUSG00000050612 <sup>a</sup> | 17  | 65637505        | 65642204      | <i>Txndc2</i>        |
| ENSMUSG00000056515              | 17  | 65651726        | 65772752      | <i>Rab31</i>         |
| ENSMUSG00000061950 <sup>a</sup> | 17  | 65782573        | 65841926      | <i>Ppp4r1</i>        |
| ENSMUSG00000024096              | 17  | 65848433        | 65885755      | <i>Ralbp1</i>        |
| ENSMUSG00000024098              | 17  | 65923066        | 65951187      | <i>Twsg1</i>         |
| ENSMUSG00000034647              | 17  | 65967501        | 66077089      | <i>Ankrd12</i>       |
| ENSMUSG00000024099 <sup>a</sup> | 17  | 66078795        | 66101559      | <i>Ndufv2</i>        |
| ENSMUSG00000024101              | 17  | 66111546        | 66120503      | <i>Wash</i>          |
| ENSMUSG00000035842 <sup>a</sup> | 17  | 66123520        | 66152167      | <i>Ddx11</i>         |
| ENSMUSG00000052105              | 17  | 66336982        | 66449750      | <i>Soga2</i>         |
| ENSMUSG00000023460              | 17  | 66494512        | 66519717      | <i>Rab12</i>         |
| ENSMUSG00000024105              | 17  | 66555252        | 66594621      | <i>Themis3</i>       |

<sup>a</sup>indicates genes that are testis-specific.
